# Supplementary material for: Estimates of CO 2 fluxes over the city of Cape Town, South Africa, through Bayesian inverse modelling
Source: Copernicus journal article supplement (doi:10.5194/acp-18-4765-2018), 2018-04-09
Supplement: Supplementary file 1 [file acp-18-4765-2018-supplement.pdf]

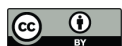

*Supplement of*

## **Estimates of CO<sub>2</sub> fluxes over the city of Cape Town, South Africa, through Bayesian inverse modelling**

**Alecia Nickless et al.**

*Correspondence to:* Alecia Nickless ([alecia.nickless@phc.ox.ac.uk](mailto:alecia.nickless@phc.ox.ac.uk))

The copyright of individual parts of the supplement might differ from the CC BY 4.0 License.

1    **Supplementary Material**

1.1   **CO<sub>2</sub> Measurements**

A single calibration standard was kept at each site, and run periodically in order to assess whether any drift occurred in the CO<sub>2</sub> measurements over time, to determine if the calibration coefficients required any adjustment. At Robben Island the measurements of the calibration standard were (mean ± (standard deviation)) 386.89 ppm (± 0.014) in November, 385.67 ppm (± 0.012) in February 2013, and 385.73 ppm (± 0.012) in June 2013. This indicates that the instrument was making stable measurements during the sixteen month campaign. The slightly higher reading in November 2012 occurred when the weather was wet, and there was more moisture contamination from the previous ambient measurements prior to calibration. At Hangklip the instrument measured the calibration standard at 378.26 ppm (± 0.009) in November 2012 and at 378.16 ppm (± 0.022) in June 2013, indicating no evidence of drift over the measurement period.

In addition to each site’s calibration standard, a travelling reference standard was also measured at close proximity in time at all three sites, including Cape Point. This standard consisted of clean air collected at the Cape Point site. The results of two of these calibration measurements are presented in Table S1. By comparing calibration measurements with Cape Point inter-site differences are ensured to be negligible, and also links the Robben Island and Hangklip sites into the greater GAW network. The instruments at Cape Point are routinely calibrated with standards shared around the GAW network, which maintains high levels of quality control. Differences were found to be small between sites, and between calibration periods using the same standard in June 2012 and June 2013.

**Table S1.** Mean and standard deviation of CO<sub>2</sub> measurements (ppm) during calibration phase using a travelling CO<sub>2</sub> standard (June 2012 and June 2013) traceable to several Cape Point CO<sub>2</sub> laboratory standards. These in turn are linked to primary CO<sub>2</sub> standards maintained at the NOAA calibration laboratory in Boulder, USA.

| FA01830               | Site          |               |               |                               |
|-----------------------|---------------|---------------|---------------|-------------------------------|
| Date                  | Cape Point    | Robben Island | Hangklip      | Maximum inter-site difference |
| June 2012             | 452.77 (0.03) | 452.88 (0.02) | 452.89 (0.03) | 0.12                          |
| June 2013             | 452.28 (0.03) | 452.86 (0.02) | 452.60 (0.03) | 0.58                          |
| June 2012 - June 2013 | 0.49          | 0.02          | 0.29          |                               |

The observed hourly CO<sub>2</sub> concentrations at the Robben Island and Hangklip sites are presented in Figure S1, together with the hourly measurements at Cape Point and the measured daily temperature at this site. There is no clear correlation between the peaks in CO<sub>2</sub> and daily temperature. From March 2012 until June 2013, the mean CO<sub>2</sub> concentration observed at Robben Island was 391.3 ppm (± 5.02), usually ranging between 389.5 and 394.2 ppm, with a minimum of 382.4 ppm and a maximum of 445.0 ppm. The measurements at Hangklip had a similar mean of 390.6 ppm (± 3.89), usually ranging between 389.5 and 391.4 ppm with a minimum of 380.4 ppm and a maximum of 430.6 ppm. The Cape Point measurements have a narrower range of 382.9 to 412.3 ppm, with a mean of 392.1 ppm, indicating less influence from local sources and sinks.

The mean diurnal cycle for each month is presented in Figure S2. Across all months, the diurnal cycle of CO<sub>2</sub> concentrations at Cape Point are relatively flat compared with Robben Island and Hangklip. In November 2012 and February 2013 the diurnal cycle for both measurement sites was the most flat. This is the summer period, when temperatures are high and the Western Cape experiences the lowest amount of rain. The amplitude of the diurnal cycle at both sites increased from April, reaching a maximum amplitude in June and July. This is during the winter rainfall period in the Western Cape. Temperatures are mild and much of the vegetation growth occurs during this period. The diurnal cycle of the Hangklip site dipped below both Cape Point and Robben Island, indicating that this site is more affected by local sinks of CO<sub>2</sub>. Robben Island consistently had the highest peaks in CO<sub>2</sub> concentrations across all months, indicating that this site was the most affected by local sources, which is what we expected.

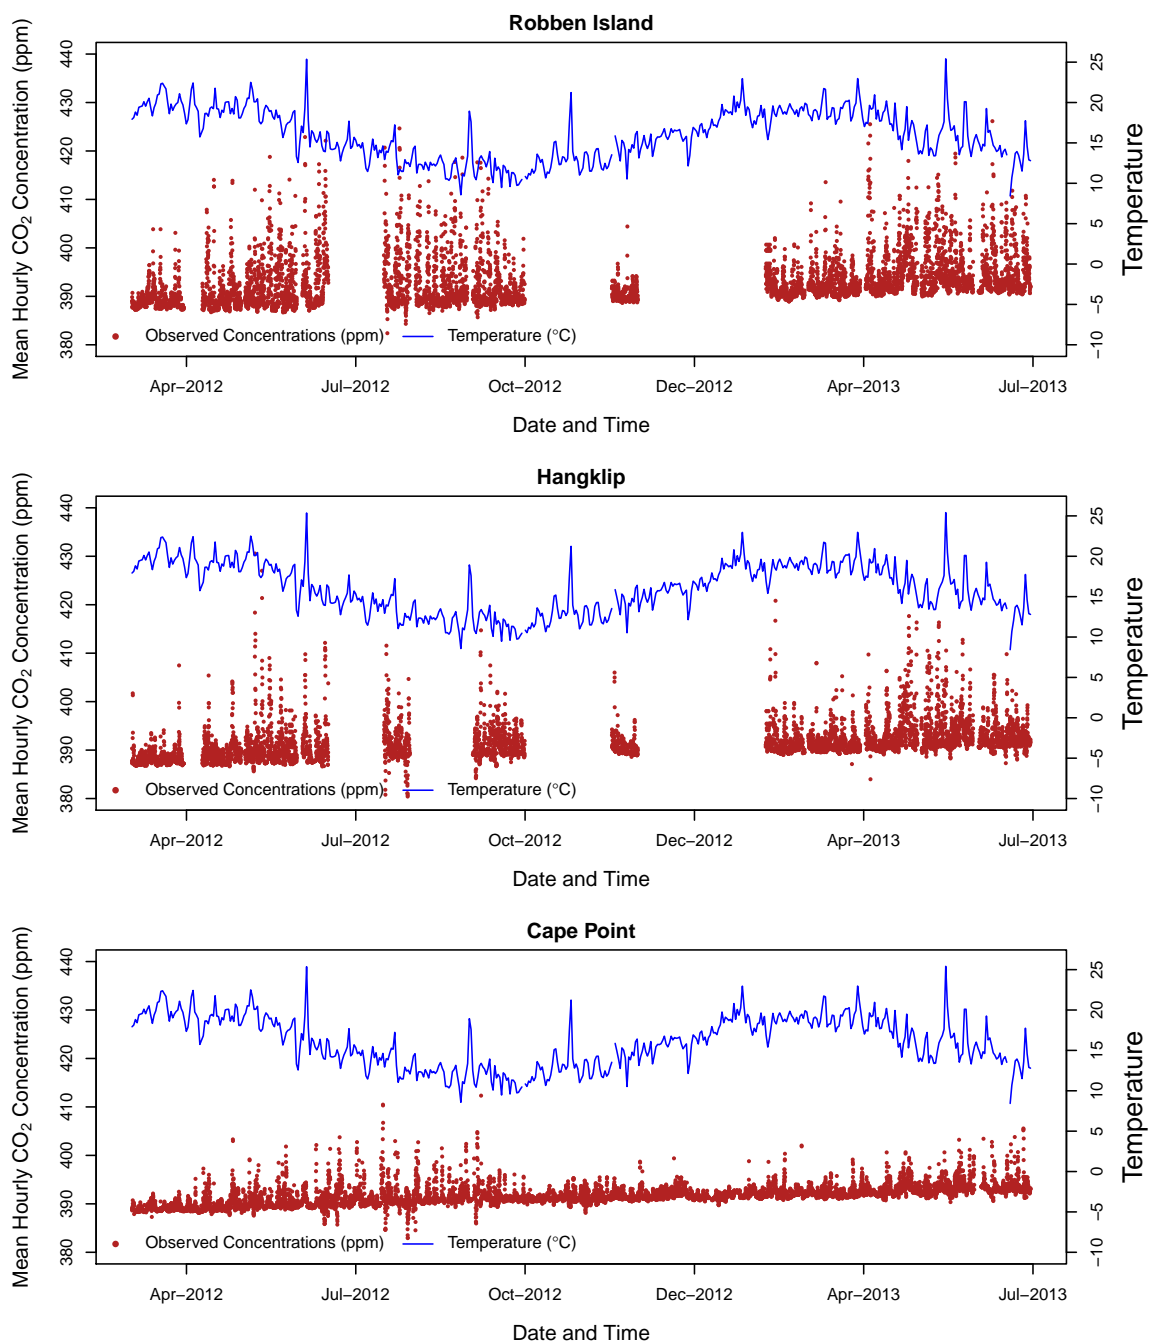

**Figure S1.** Observed hourly CO<sub>2</sub> concentrations (ppm) (left-side axis) at the Robben Island (top closed red circles) and Hangklip (bottom closed black circles) measurement sites. The blue line appearing at the bottom of each plot is the CO<sub>2</sub> concentration measurements at Cape Point station (ppm) and the green line at the top of each plot is the mean daily temperature (°C) as measured at the Cape Point station, which is represented by the right-side axis.

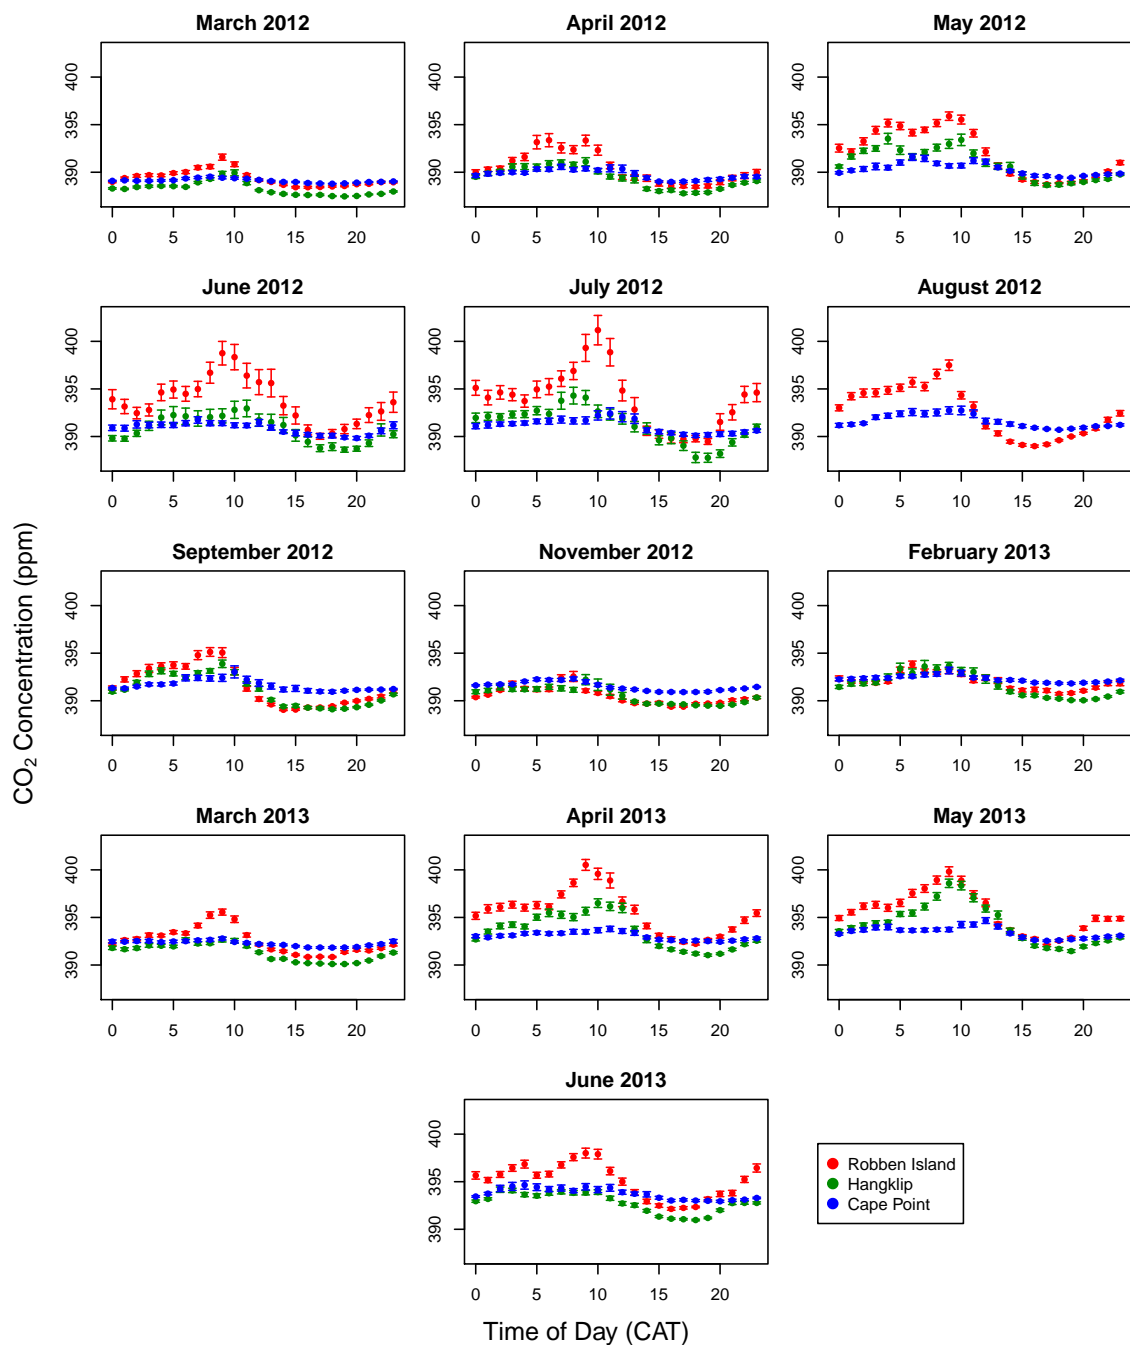

**Figure S2.** Diurnal cycle of the observed CO<sub>2</sub> concentrations (ppm) for each month and at each site with 95% confidence intervals, where the standard error is calculated over all measurements available for that hour of the day during that particular month. Cape Point is the generally flat diurnal cycle in blue, Robben Island with the generally larger daytime CO<sub>2</sub> concentrations in red, and Hangklip with the generally lower afternoon CO<sub>2</sub> concentrations in black.

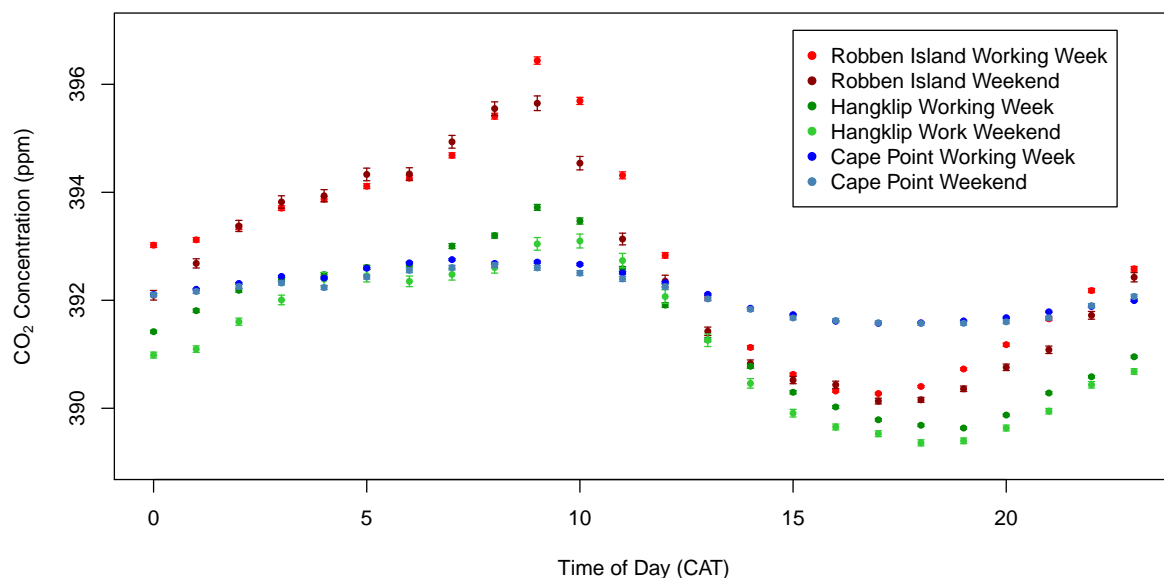

**Figure S3.** Diurnal cycle of the observed CO<sub>2</sub> concentrations (ppm) over the full measurement period from March 2012 until June 2013 at each site with 95% confidence intervals, where the standard error is calculated over all measurements available for that hour of the day during the entire measurement period, separated by site (Cape Point - blue and light blue, Robben Island - red and dark red, Hangklip - black and grey) and by working week (brighter colour) and weekend (duller colour).

The mean diurnal cycle over the whole measurement period is presented in Figure S3, separated by site and by working week and weekend. The background site, Cape Point, shows no discernible difference between the mean concentrations over the week and weekend, whereas Robben Island and Hangklip sites measure concentrations during the working week which tend to be larger across most of the day. Both the early morning and afternoon means show a clear tendency for these sites to have larger concentrations during the working week compared with the same time of day over the weekend, which can only be due to anthropogenic influences. This supports the separation of fossil fuel fluxes into working week and weekend contributions.

**Table S2.** The number of days with available CO<sub>2</sub> measurement data for each month (out of a possible four week period considered) and overall percentage available data out of 16 four-week periods for each site.

| Site          | Year / Month |    |    |    |    |    |    |    |      |    |   |    |    |    |    |    | Overall<br>Percentage |
|---------------|--------------|----|----|----|----|----|----|----|------|----|---|----|----|----|----|----|-----------------------|
|               | 2012         |    |    |    |    |    |    |    | 2013 |    |   |    |    |    |    |    |                       |
|               | 3            | 4  | 5  | 6  | 7  | 8  | 9  | 10 | 11   | 12 | 1 | 2  | 3  | 4  | 5  | 6  |                       |
| Robben Island | 28           | 21 | 28 | 14 | 14 | 28 | 28 | 0  | 14   | 0  | 0 | 21 | 28 | 28 | 28 | 28 | 68.75                 |
| Hangklip      | 28           | 21 | 28 | 14 | 14 | 0  | 28 | 0  | 14   | 0  | 0 | 21 | 28 | 28 | 28 | 28 | 62.50                 |
| Combined      | 56           | 42 | 56 | 28 | 28 | 28 | 56 | 0  | 28   | 0  | 0 | 42 | 56 | 56 | 56 | 56 | 65.63                 |

Table S2 provides the measured CO<sub>2</sub> concentration availability at each site. Robben Island had slightly higher data availability compared with Hangklip, with a 65.6% data availability overall for the sixteen month measurement campaign. Each site was equipped with a Hauwei USB modem connected to a 3G network, and were set to submit data to an email address on a regular basis. Through these emails or through connecting remotely to the instruments, instrumentation problems could be detected. Most of the down-time at the sites was attributed to either pump failure, or occasionally the instrument software had failed and there was no available person to restart the instrument due to limited access to these sites. Robben Island lighthouse is manned, and therefore it was possible to request the lighthouse keeper to restart the instrument when frozen, but more regular than expected pump problems required visits to the site to replace the offending device. This entailed making arrangements for unplanned voyages to Robben Island, which could take some time to arrange. Hangklip is unmanned, and the site has strict access control, therefore problems at this site tended to take slightly longer to remedy. The final four months considered in this study had the best continuity of data availability.

1.2 Model Assessment

To determine if the prescribed prior covariance parameters were consistent with the model assumptions, the sum of the squared normalised residuals was compared against the  $\chi^2$  distribution. For most months the standardised statistic was close to one, but in the case of June and July 2012, this statistic was above 2. We did not scale the variances independently for each month, and therefore the single scaling factor of 2 for the prior flux variances was not large enough for all months. The statistic remained below 2.5 for all months, and had a minimum of 0.68 for the month of November 2012. The mean of the statistic over all months was 1.48. A subsequent study will assess an alternative approach to determine prior flux uncertainties, which would guarantee compliance of the sum of the squared normalised residuals to follow the  $\chi^2$  distribution.

**Table S3.** Sum of the squared normalised residuals for each month, which should approximate a  $\chi^2$  distribution with one degree of freedom.

| Month   | $\chi^2$ statistic | Percentage available data |
|---------|--------------------|---------------------------|
| Mar2012 | 1.006              | 100%                      |
| Apr2012 | 1.089              | 75%                       |
| May2012 | 1.959              | 100%                      |
| Jun2012 | 2.473              | 50%                       |
| Jul2012 | 2.170              | 50%                       |
| Aug2012 | 1.586              | 50%                       |
| Sep2012 | 1.028              | 100%                      |
| Nov2012 | 0.678              | 50%                       |
| Feb2012 | 0.938              | 75%                       |
| Mar2013 | 1.048              | 100%                      |
| Apr2013 | 1.776              | 100%                      |
| May2013 | 1.829              | 100%                      |
| Jun2013 | 1.706              | 100%                      |

1.3 Modelled Wind

Figure S4 provides the average wind speed and direction for the domain for each month, as modelled by CCAM. The plots were created using the R package rasterVis (Lamigueiro, 2016).

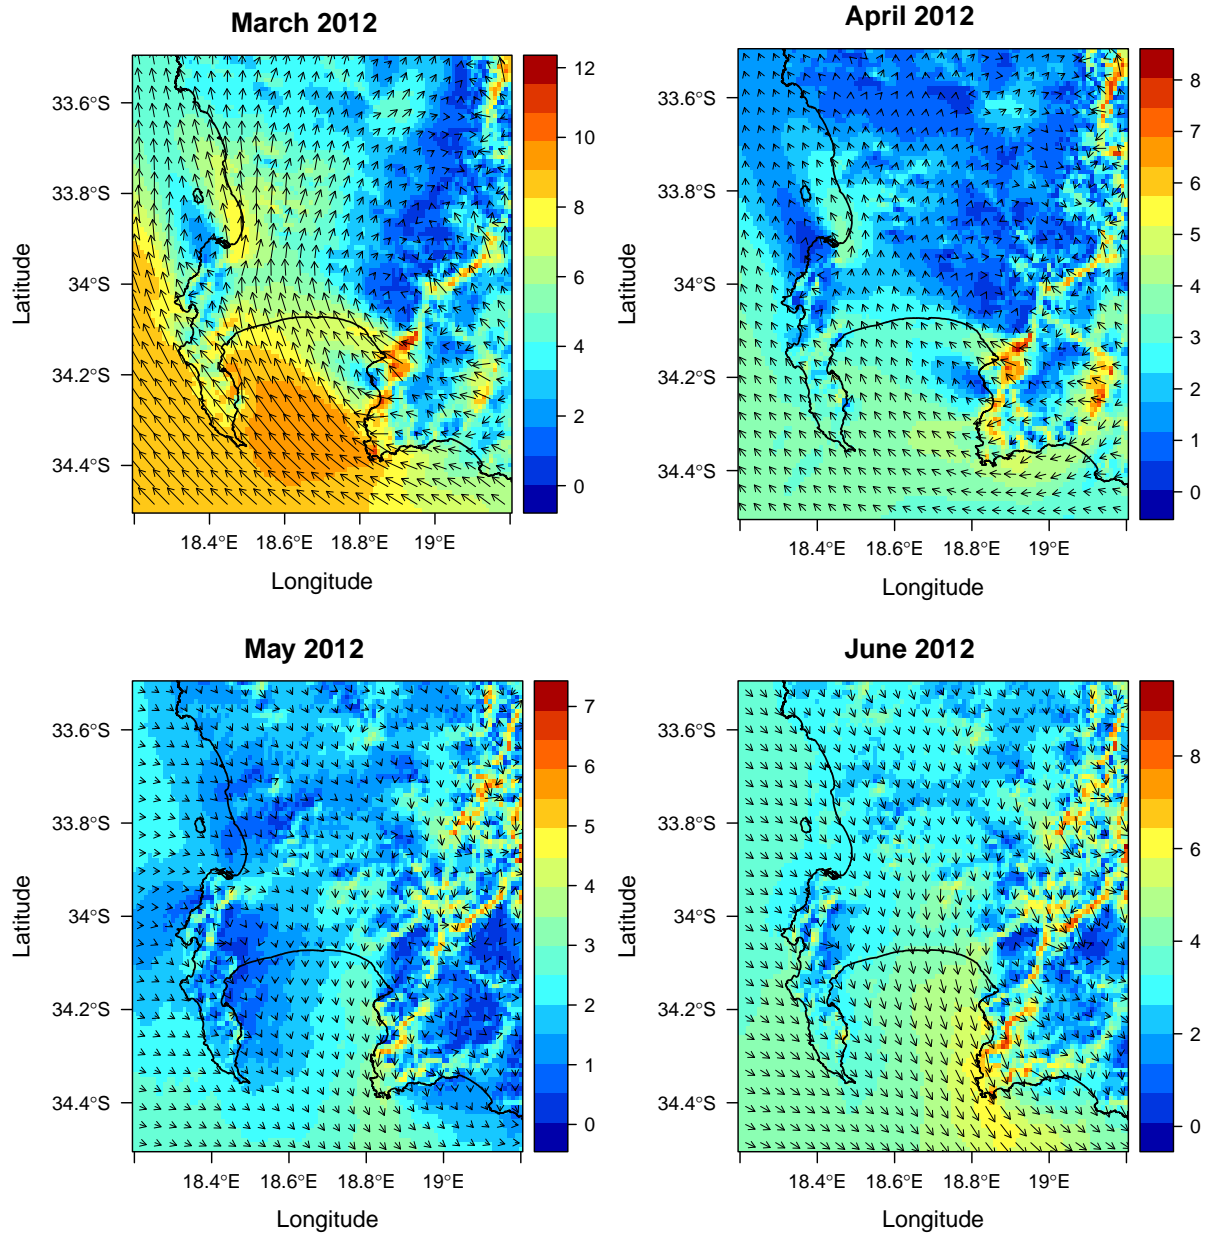



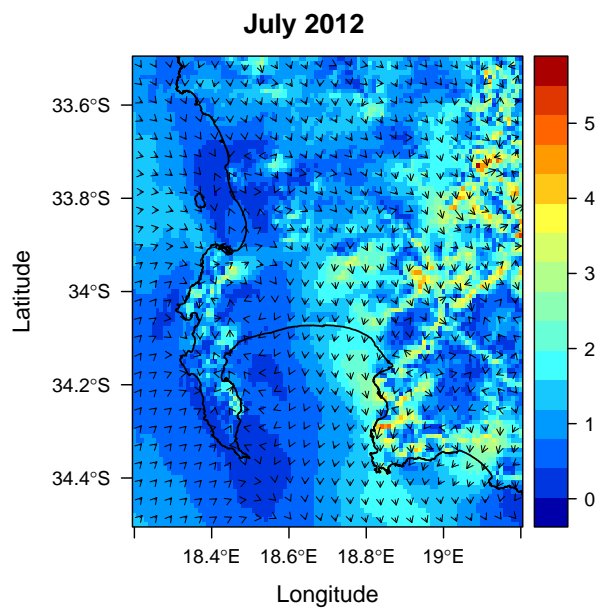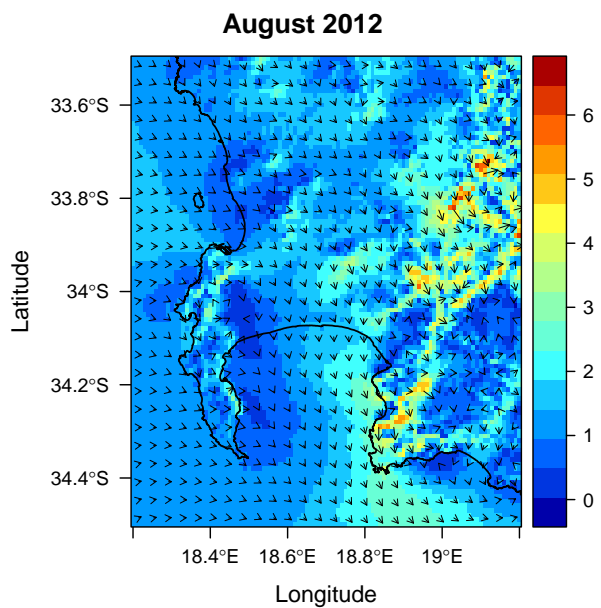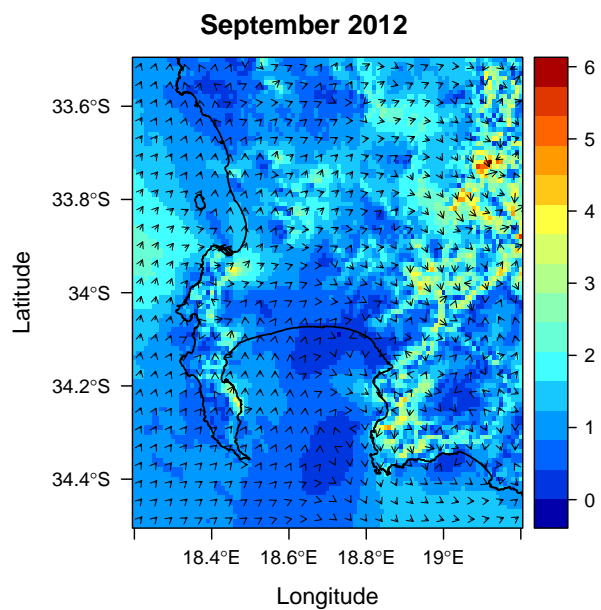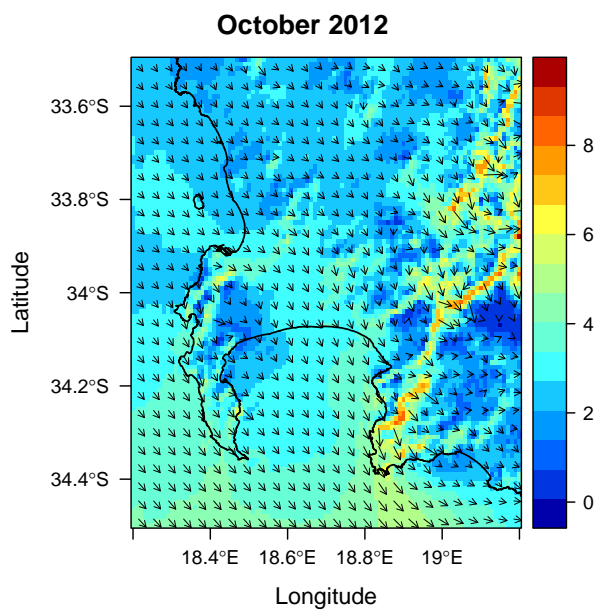

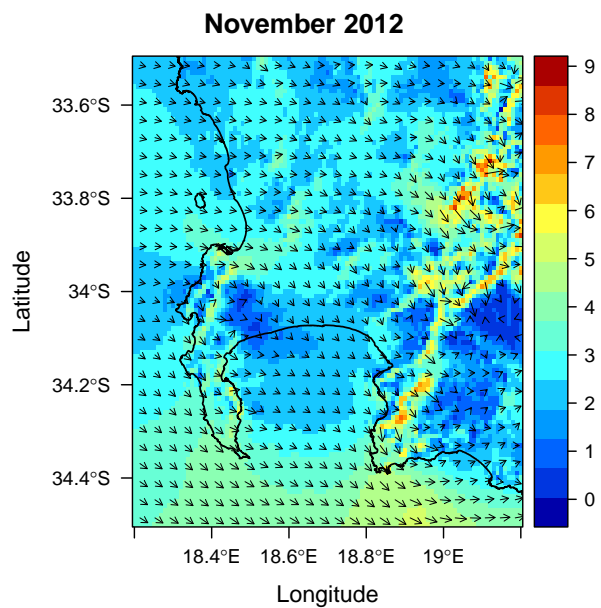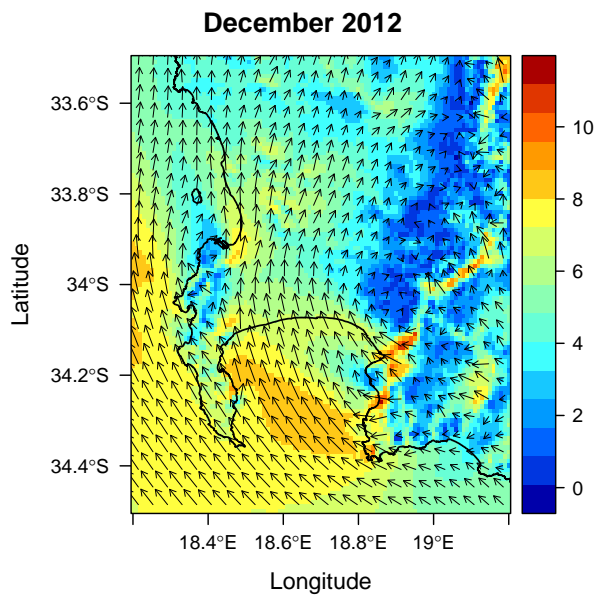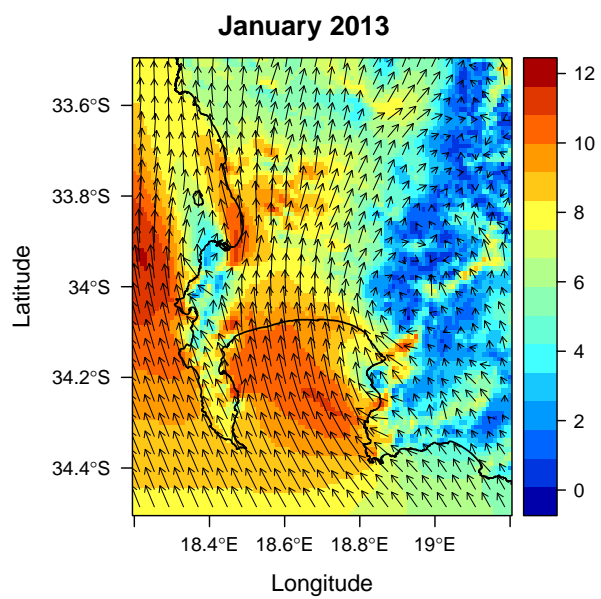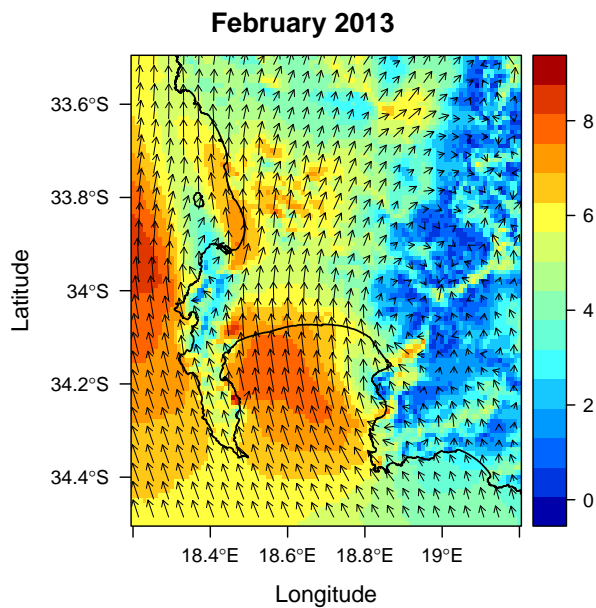

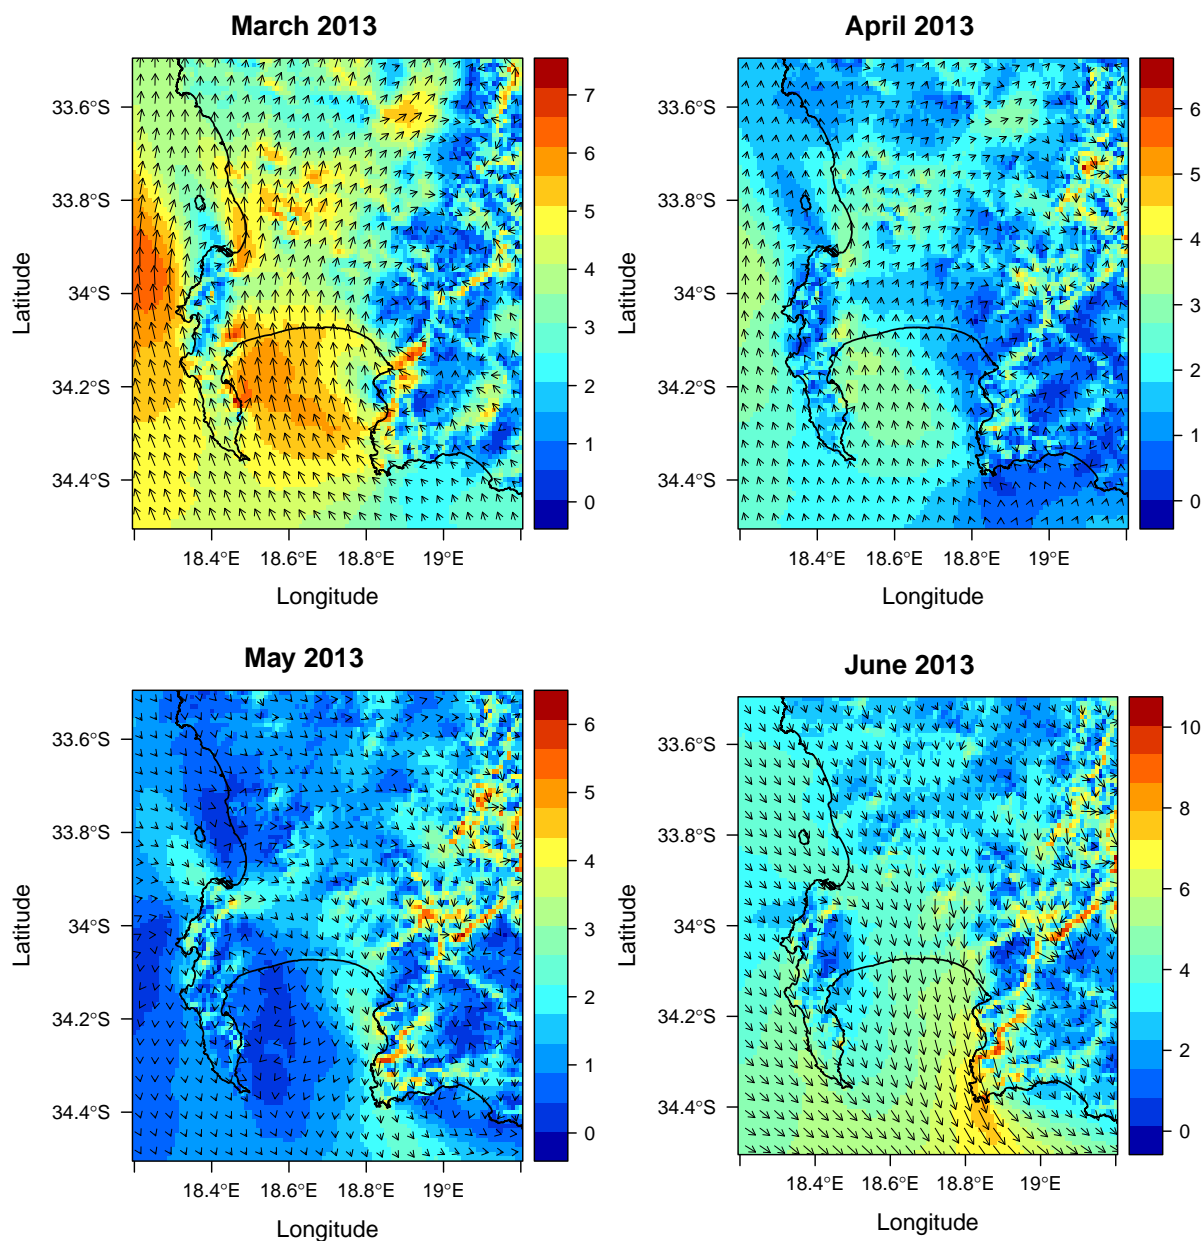

**Figure S4.** Mean modelled wind speed and direction in the Cape Town domain for each month. The colourbar represents the mean wind speed (m/s).

## **1.4 Modelled Concentrations**

The time series for the modelled concentrations is discussed in Section 3.1 of the main paper.

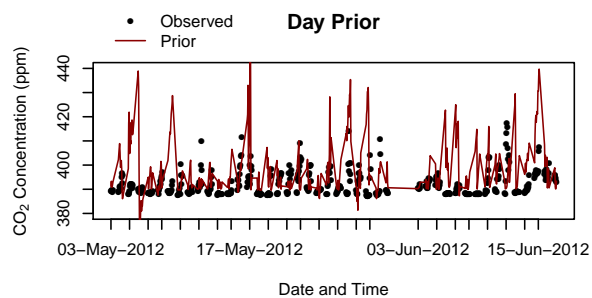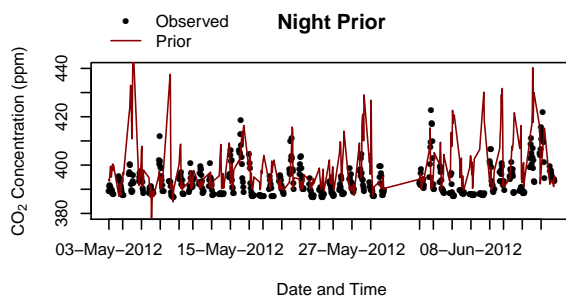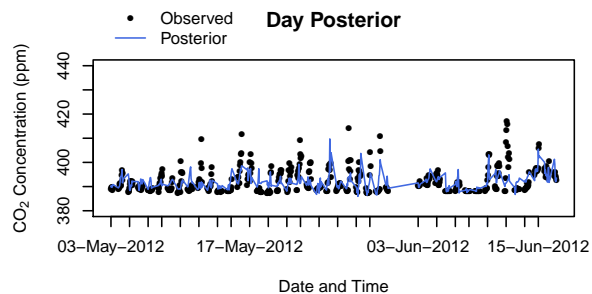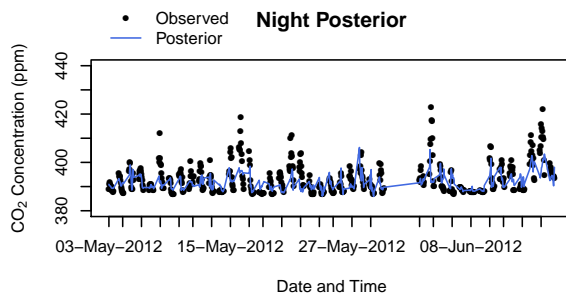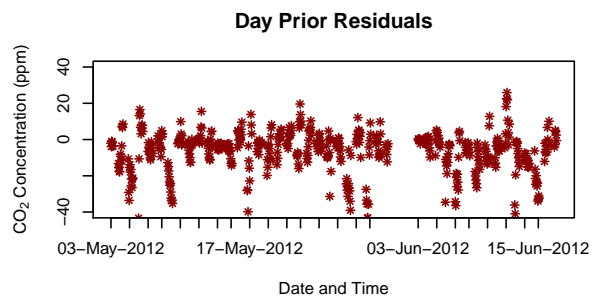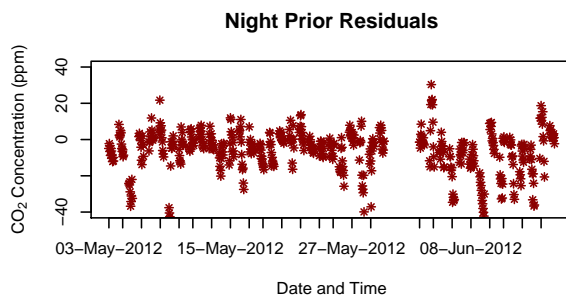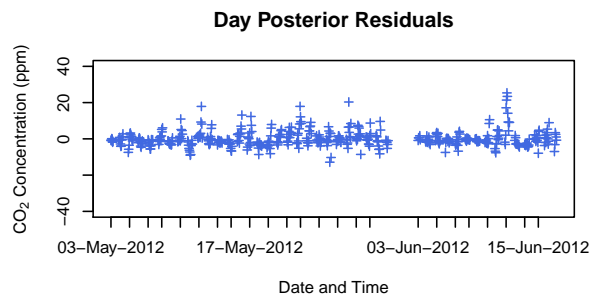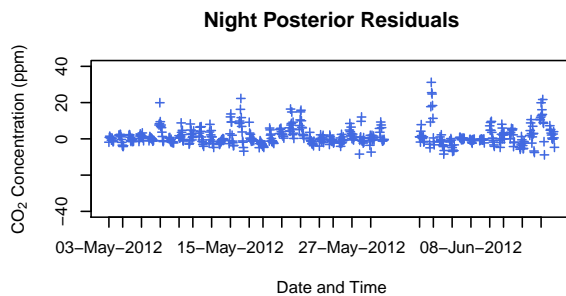

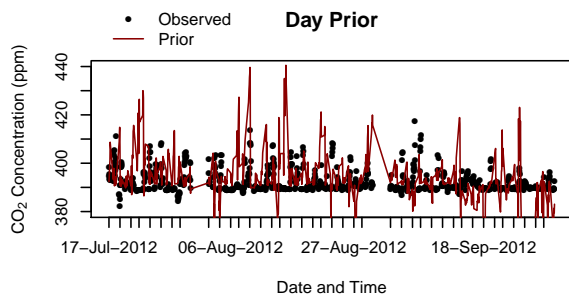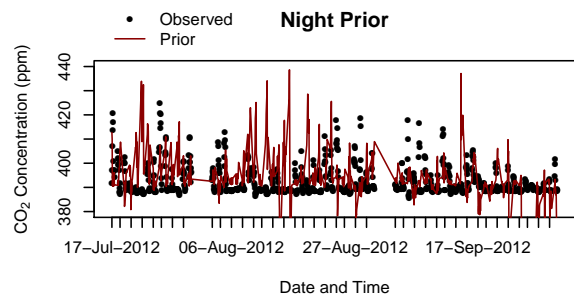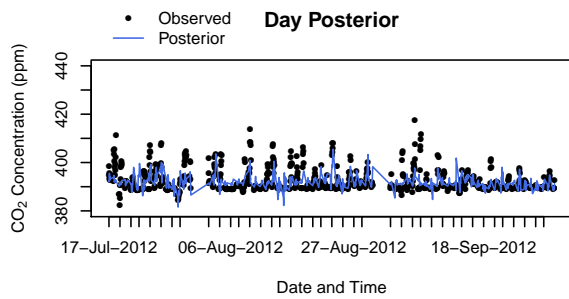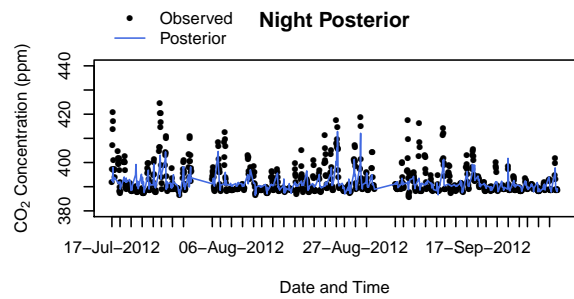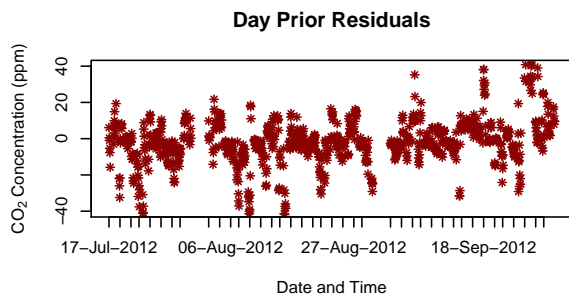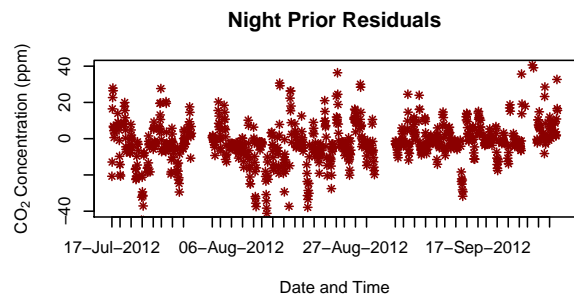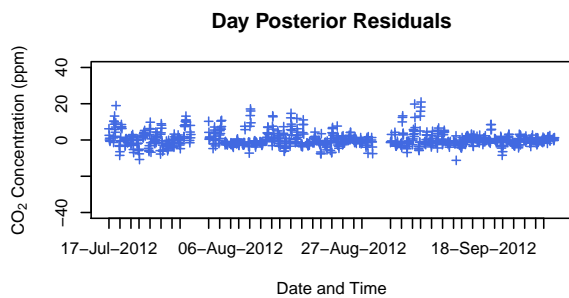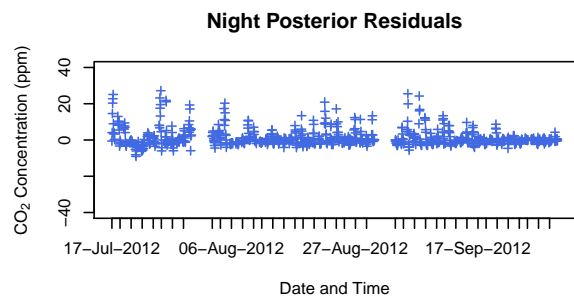

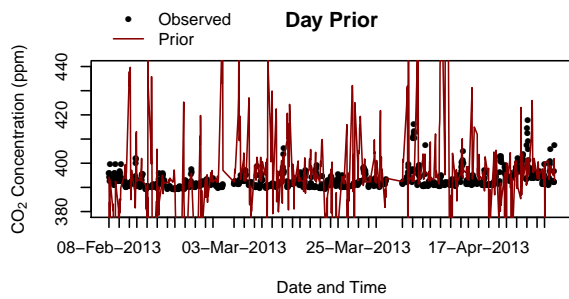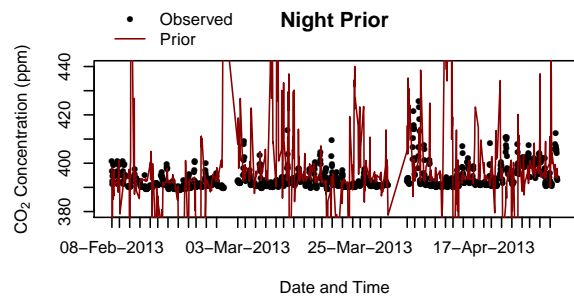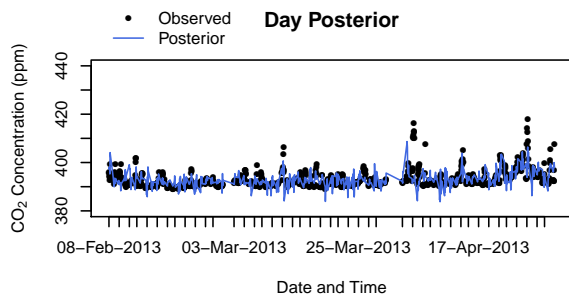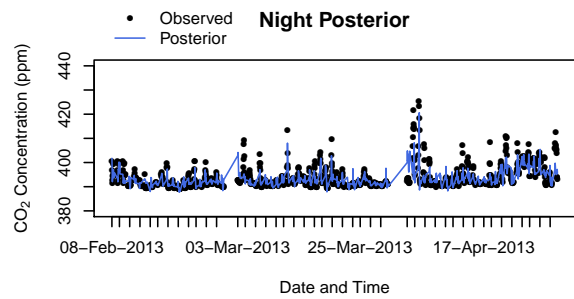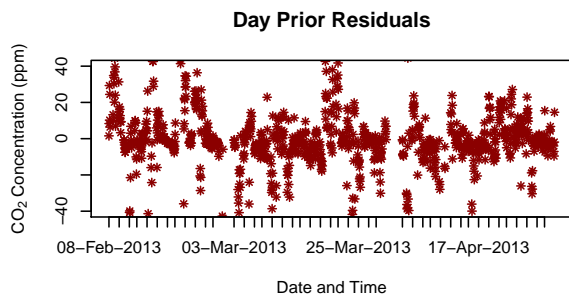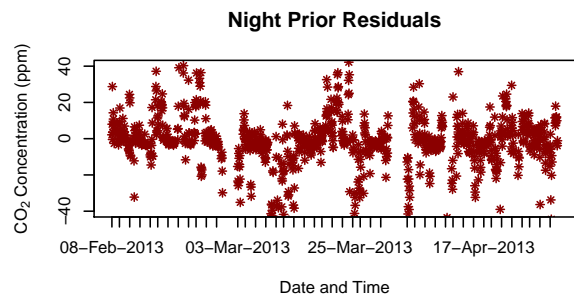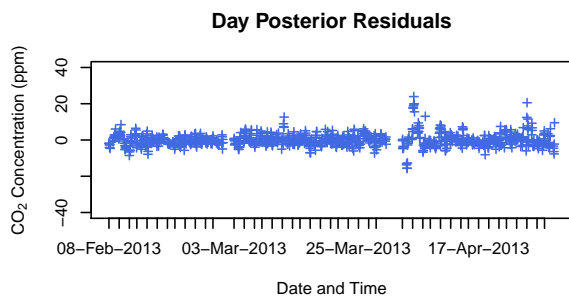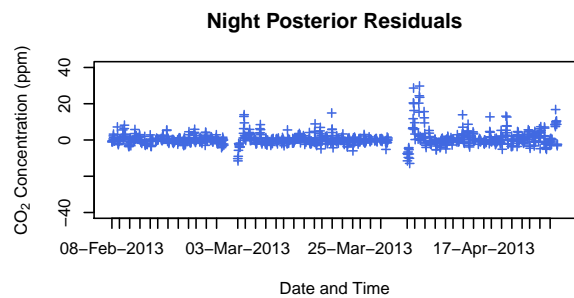

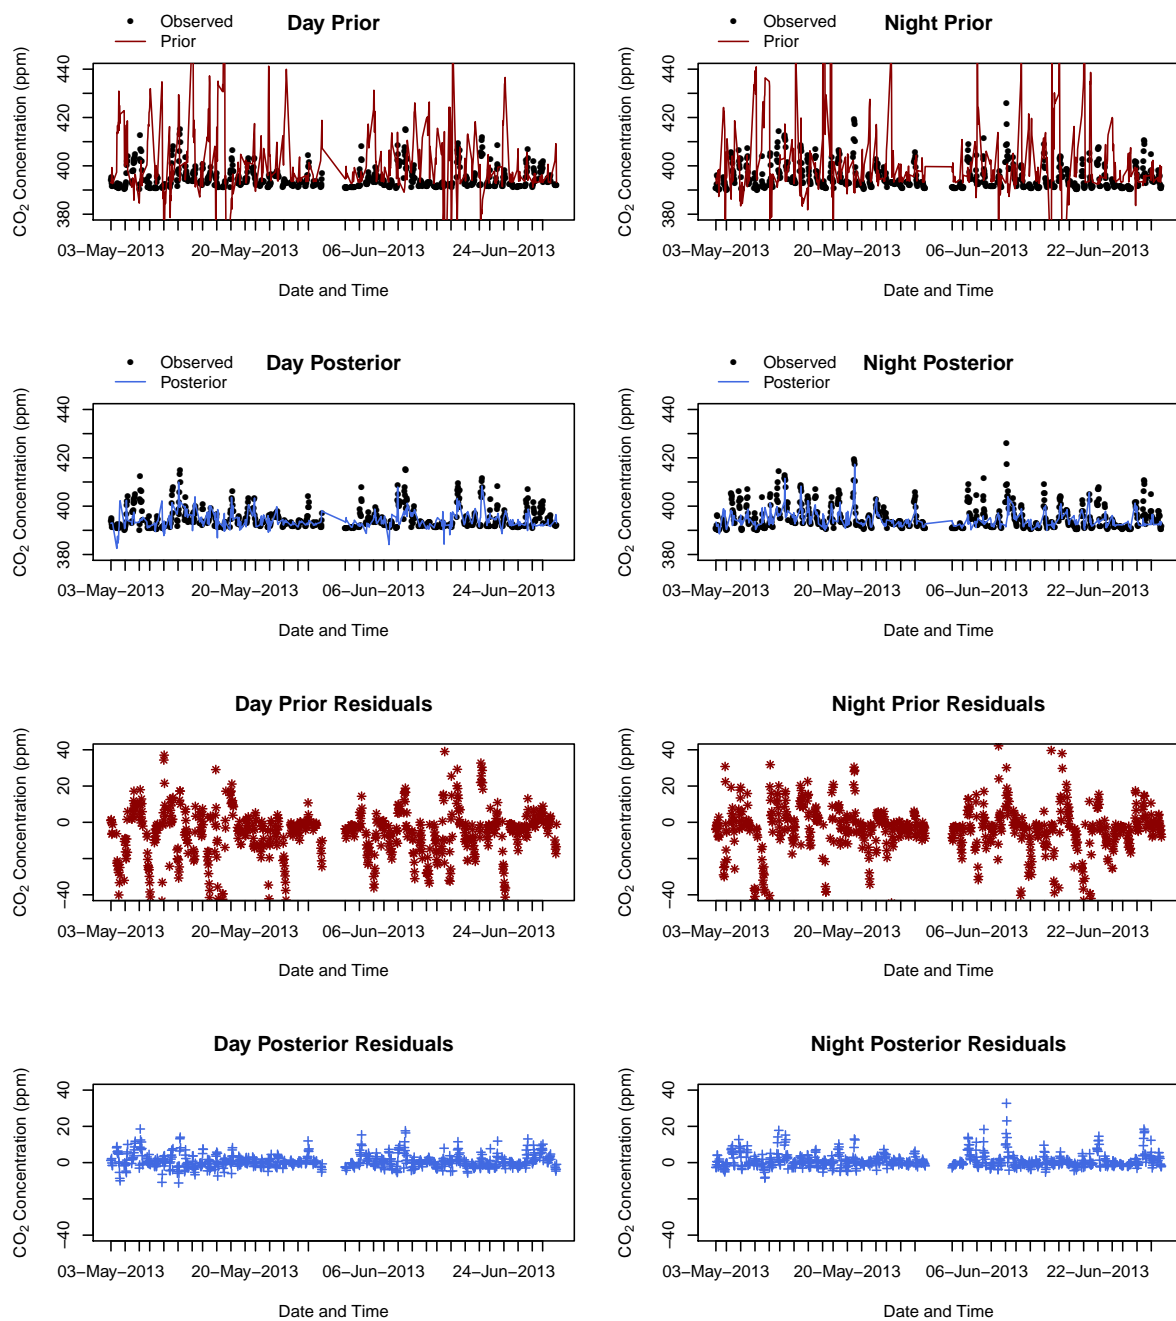

**Figure S5.** The top 4 panels provide a time series of the observed, prior and posterior modelled concentrations at the Robben Island site. The time series is separated into day and night-time periods. The residuals between the modelled and observed concentrations, defined as the difference between the observed and modelled concentrations, are provided in the lower panel 4 panels. The first 2 months are presented in the main paper in section 3.1.



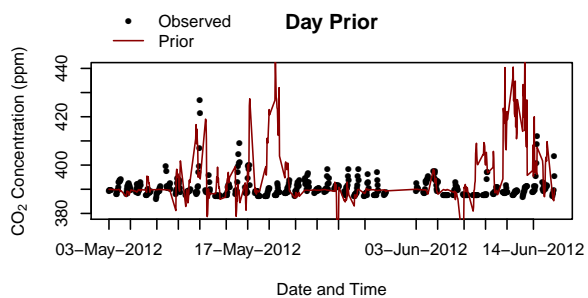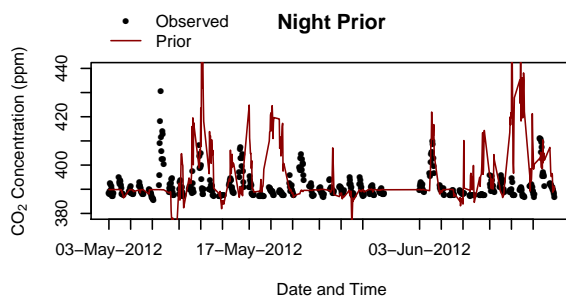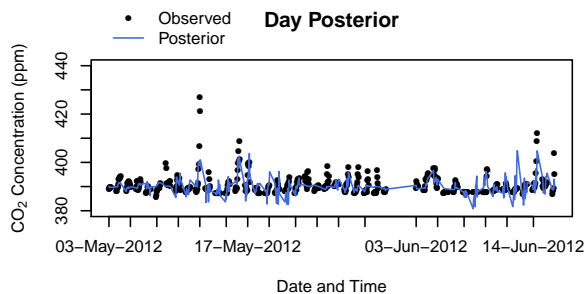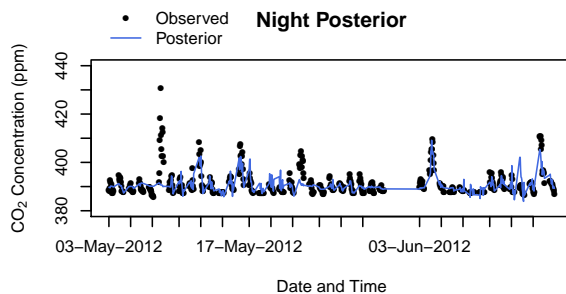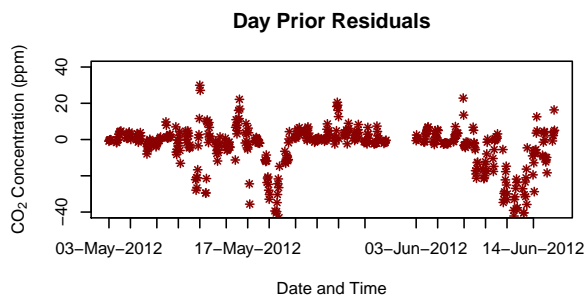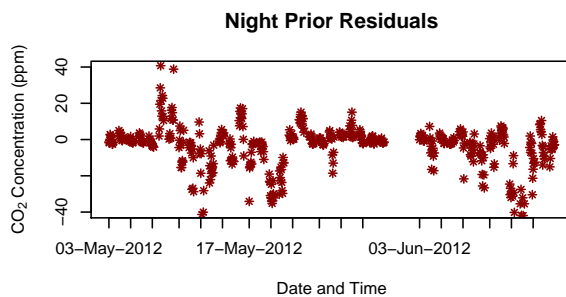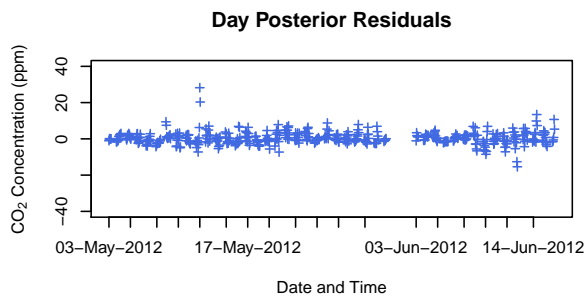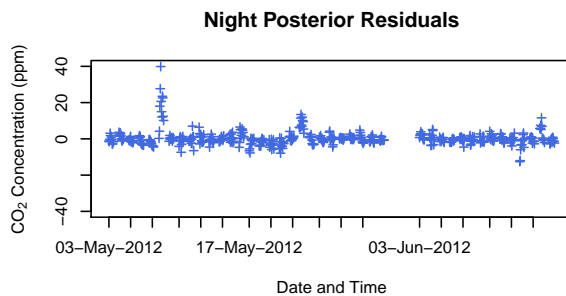

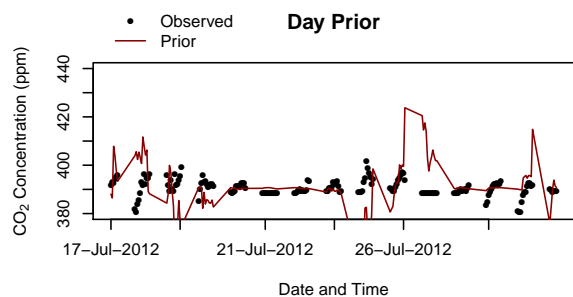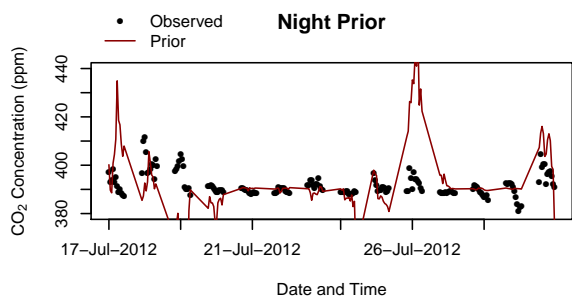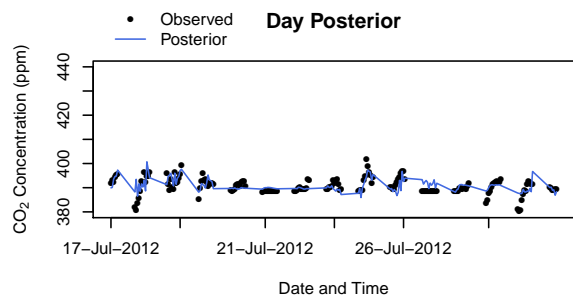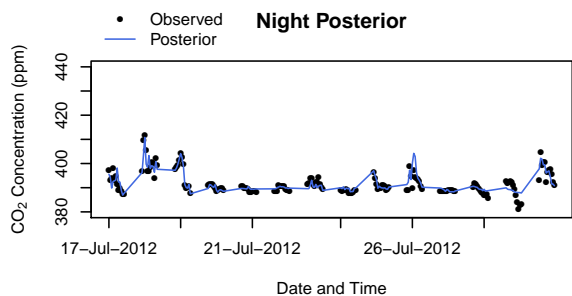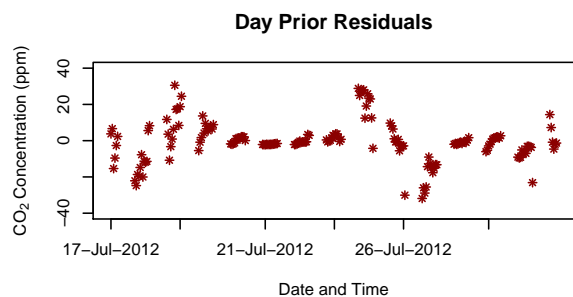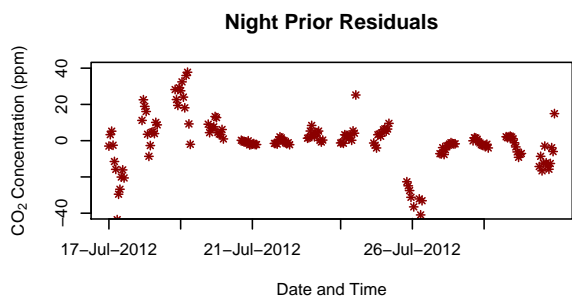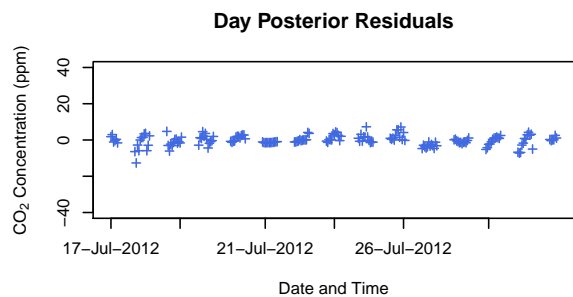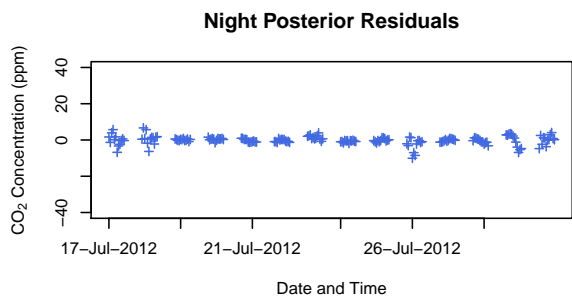

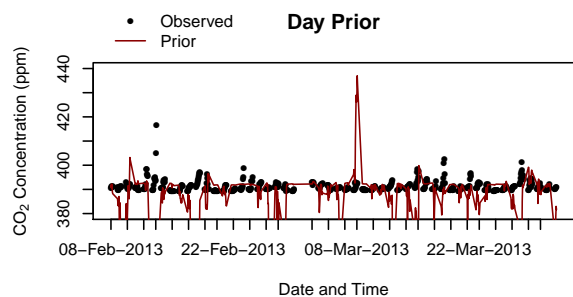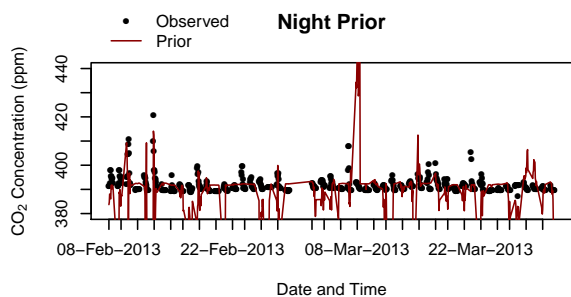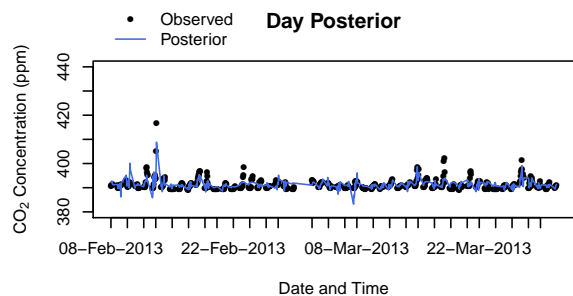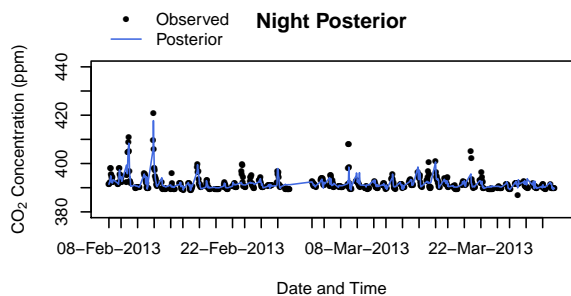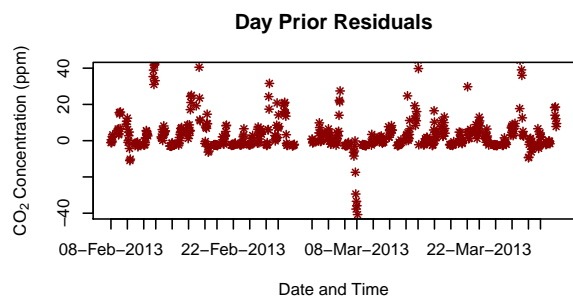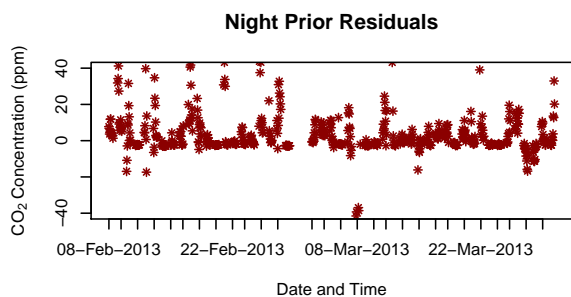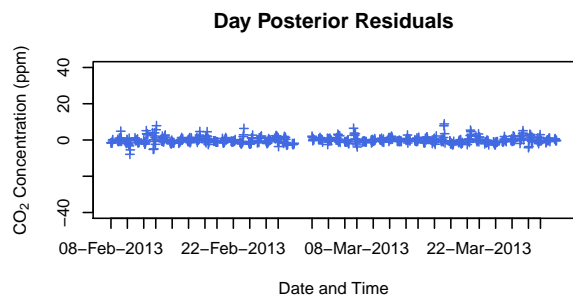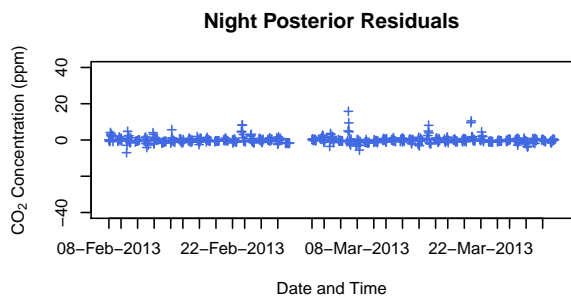

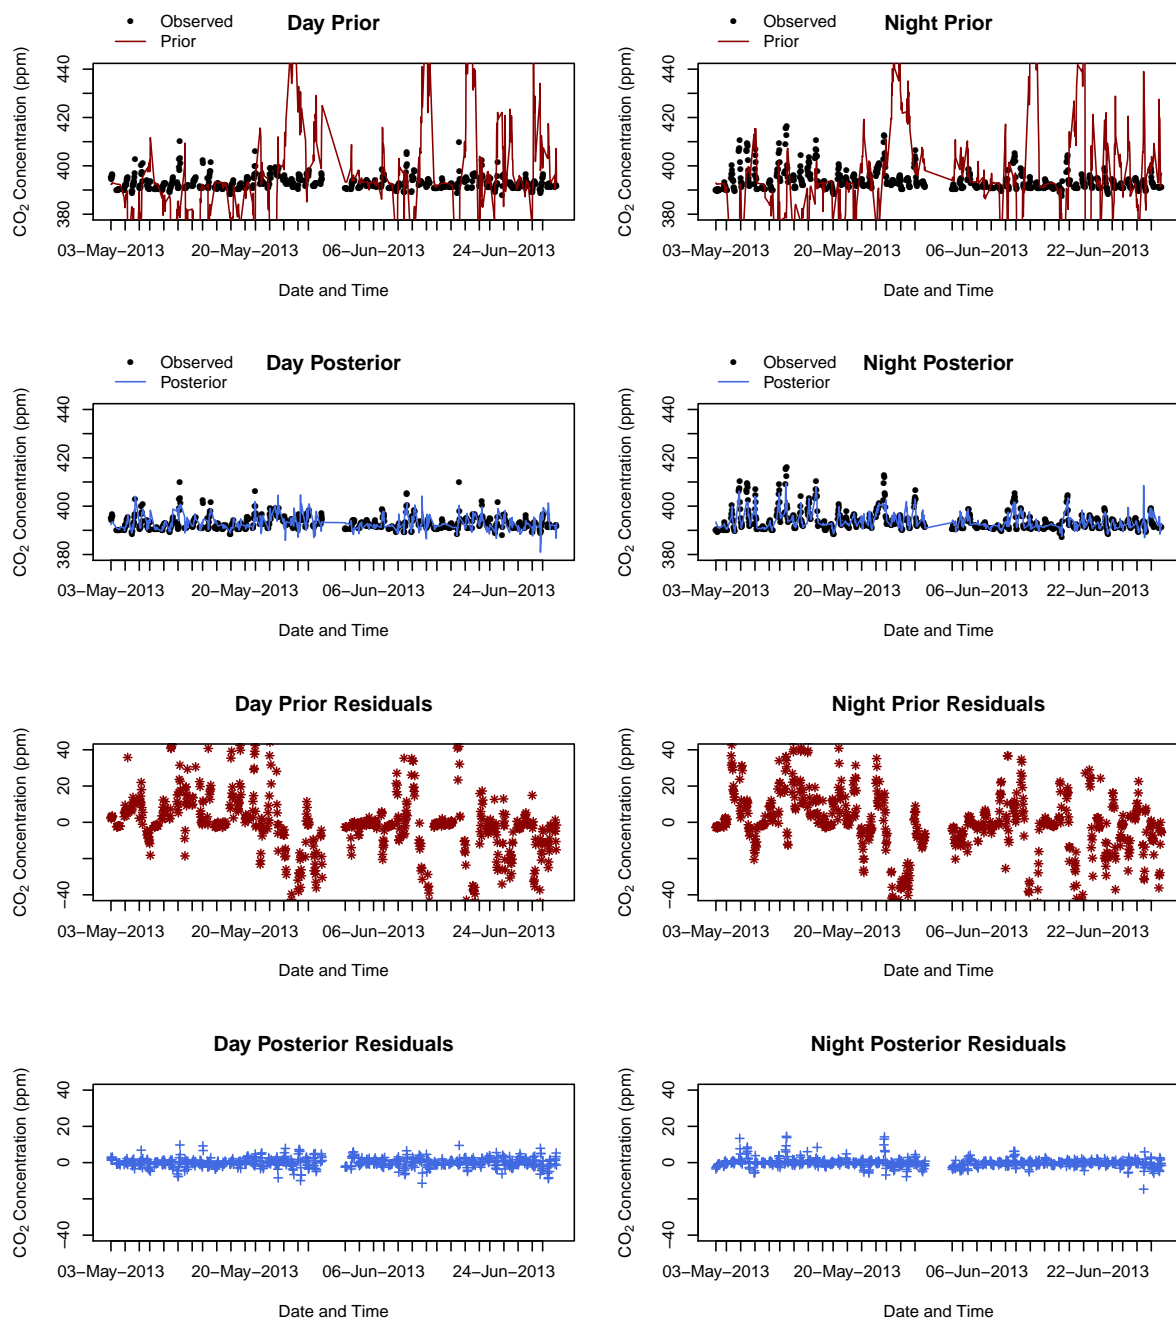

**Figure S6.** The top 4 panels provide a time series of the observed, prior and posterior modelled concentrations at the Hanglip site. The time series is separated into day and night-time periods. The residuals between the modelled and observed concentrations, defined as the difference between the observed and modelled concentrations, are provided in the lower panel 4 panels. The first 2 months are presented in the main paper in section 3.1.

## 1.5 Diurnal Cycle

The observed, prior and posterior modelled diurnal cycle, separated into working week and weekend CO<sub>2</sub> concentrations, are provided for each site and for each month in Figures S7 and S8. For all months, the diurnal cycle of the posterior modelled concentrations is relatively flat in comparison with the observed diurnal cycle, and usually sits at a higher mean level in the case of Robben Island, and at a lower mean level in the case of Hangklip. Compared with the prior modelled concentrations, the posterior diurnal cycle matches better with the observed concentrations in terms of the peaks and troughs of the cycle and in terms of the mean level of the concentrations at each hour, although the posterior cycle still appears relatively flat in comparison to the observed cycle.

April 2013 at the Robben Island site provides an example where the prior modelled concentrations had working week concentrations that were above those for the weekend during the early morning hours, whereas the observed concentrations showed the opposite situation. After the inversion, the posterior estimates had mean concentrations for the weekend that were above those for the working week during the early morning hours, matching better with the observed diurnal cycle.

Therefore the inversion does show an ability to improve estimates of the diurnal cycle, despite only separating the sources into day and night sources over a week period, and further separating the fossil fuel sources into weekend and week sources.

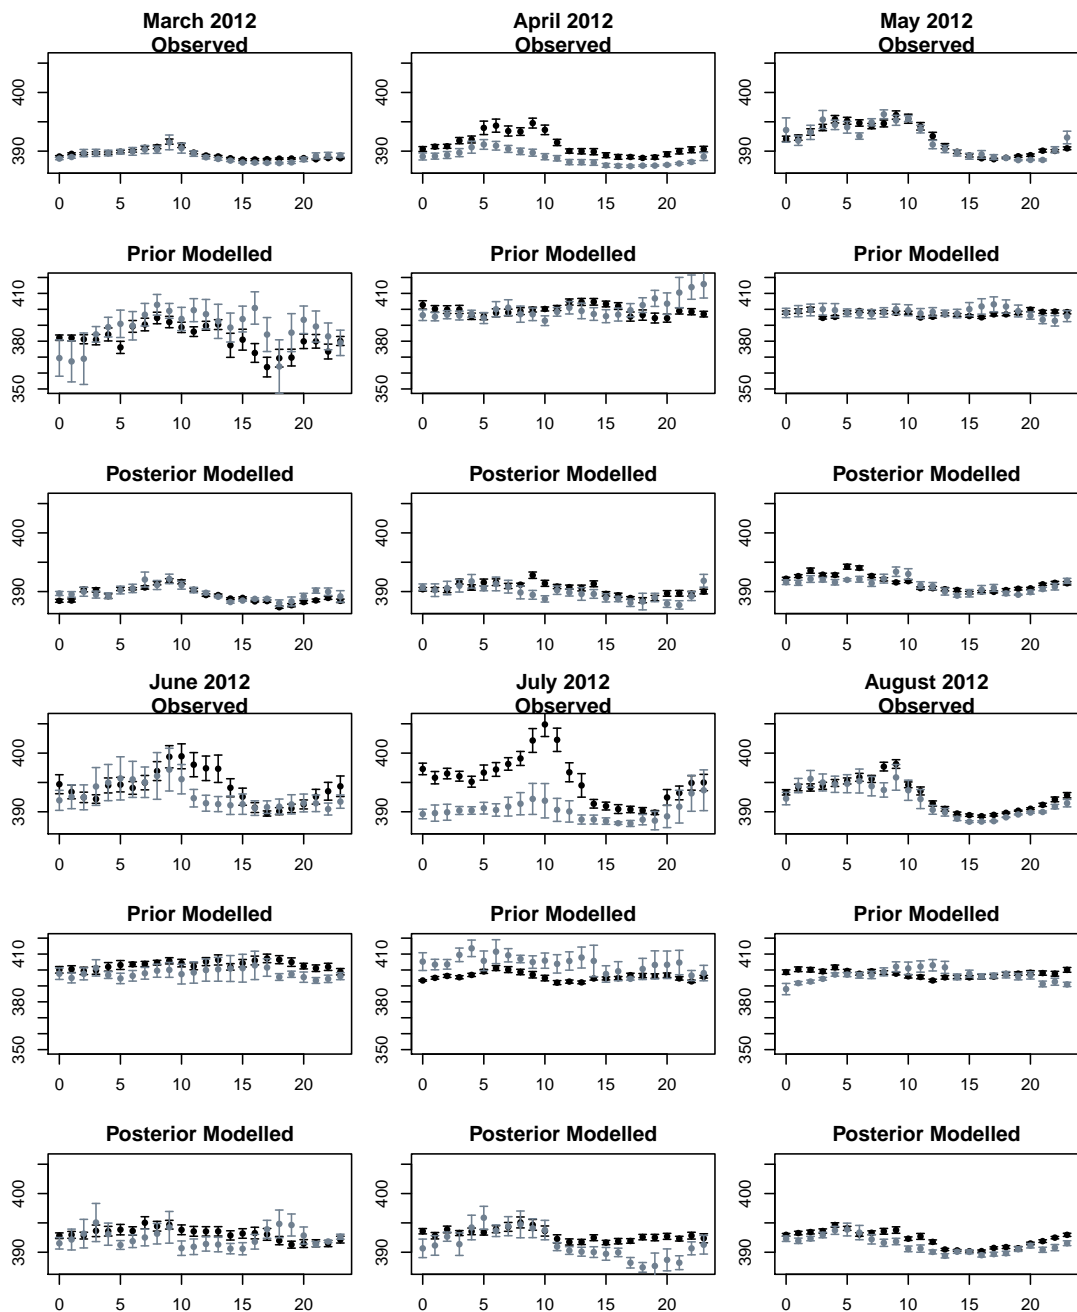

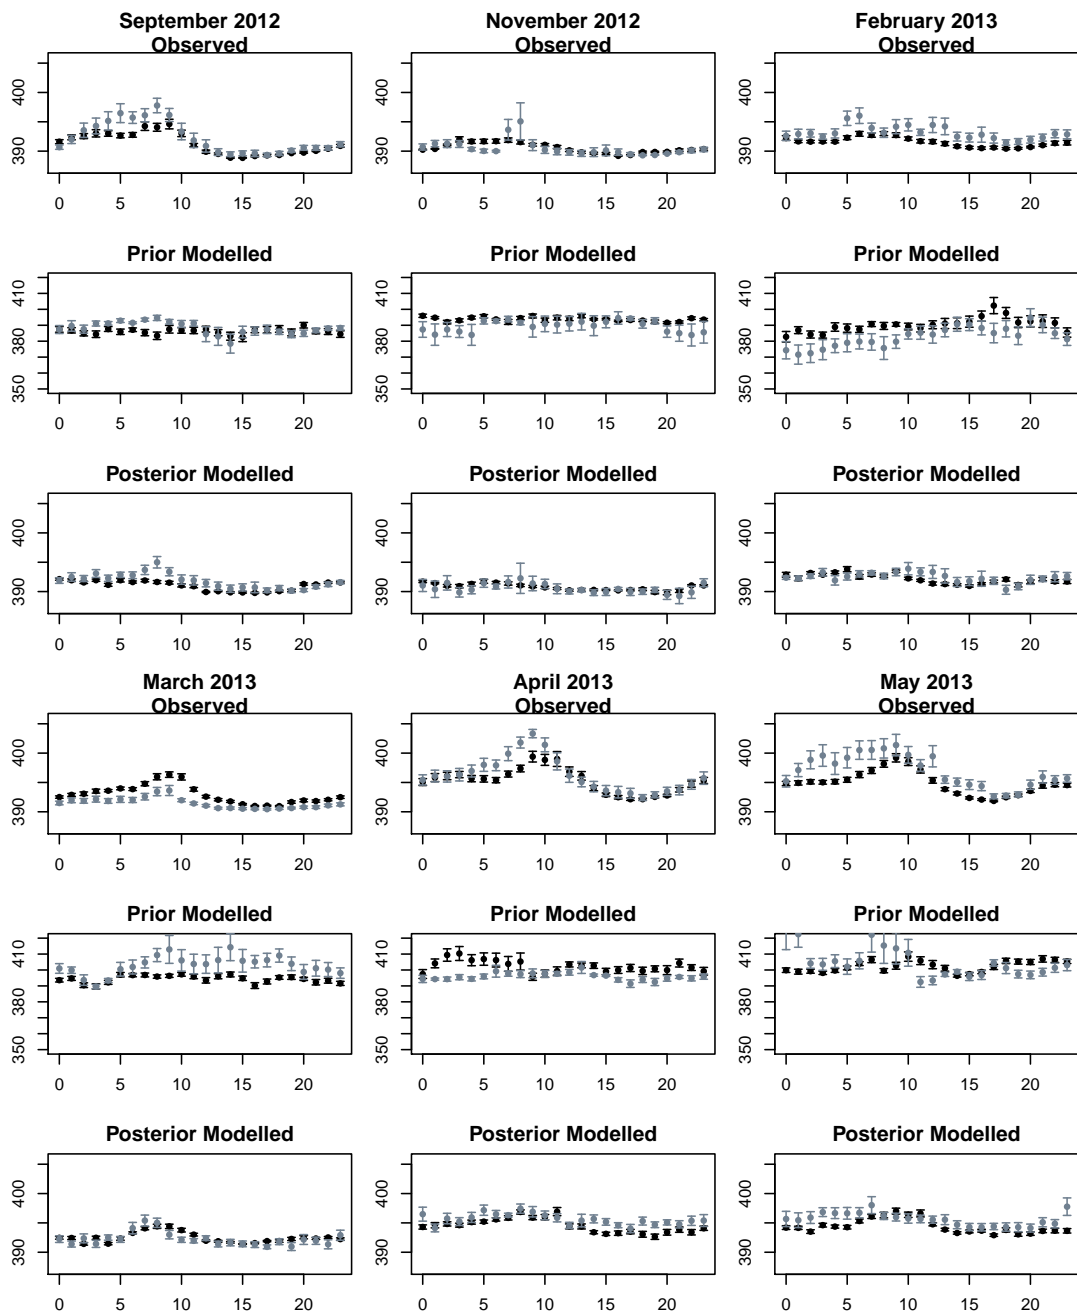

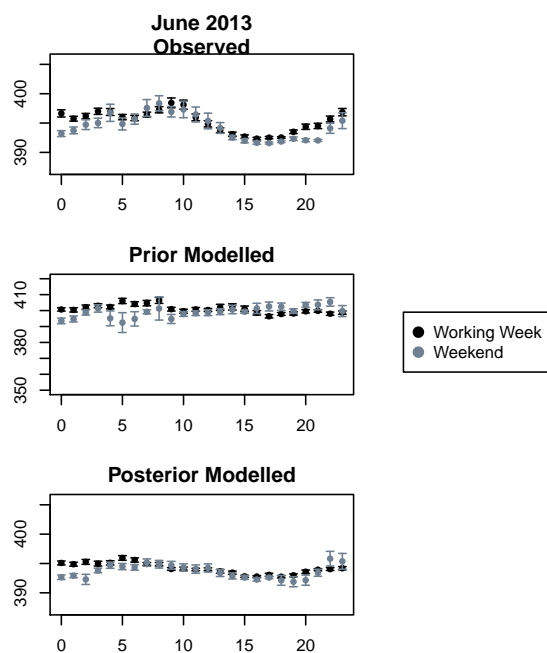

**Figure S7.** Diurnal cycle of the observed, prior modelled and posterior modelled CO<sub>2</sub> concentrations (ppm) at Robben Island, separated into working week (black) and weekend concentrations (grey), for each month with 95% confidence intervals, where the standard error is calculated over all measurements available for that hour of the day during that particular month.



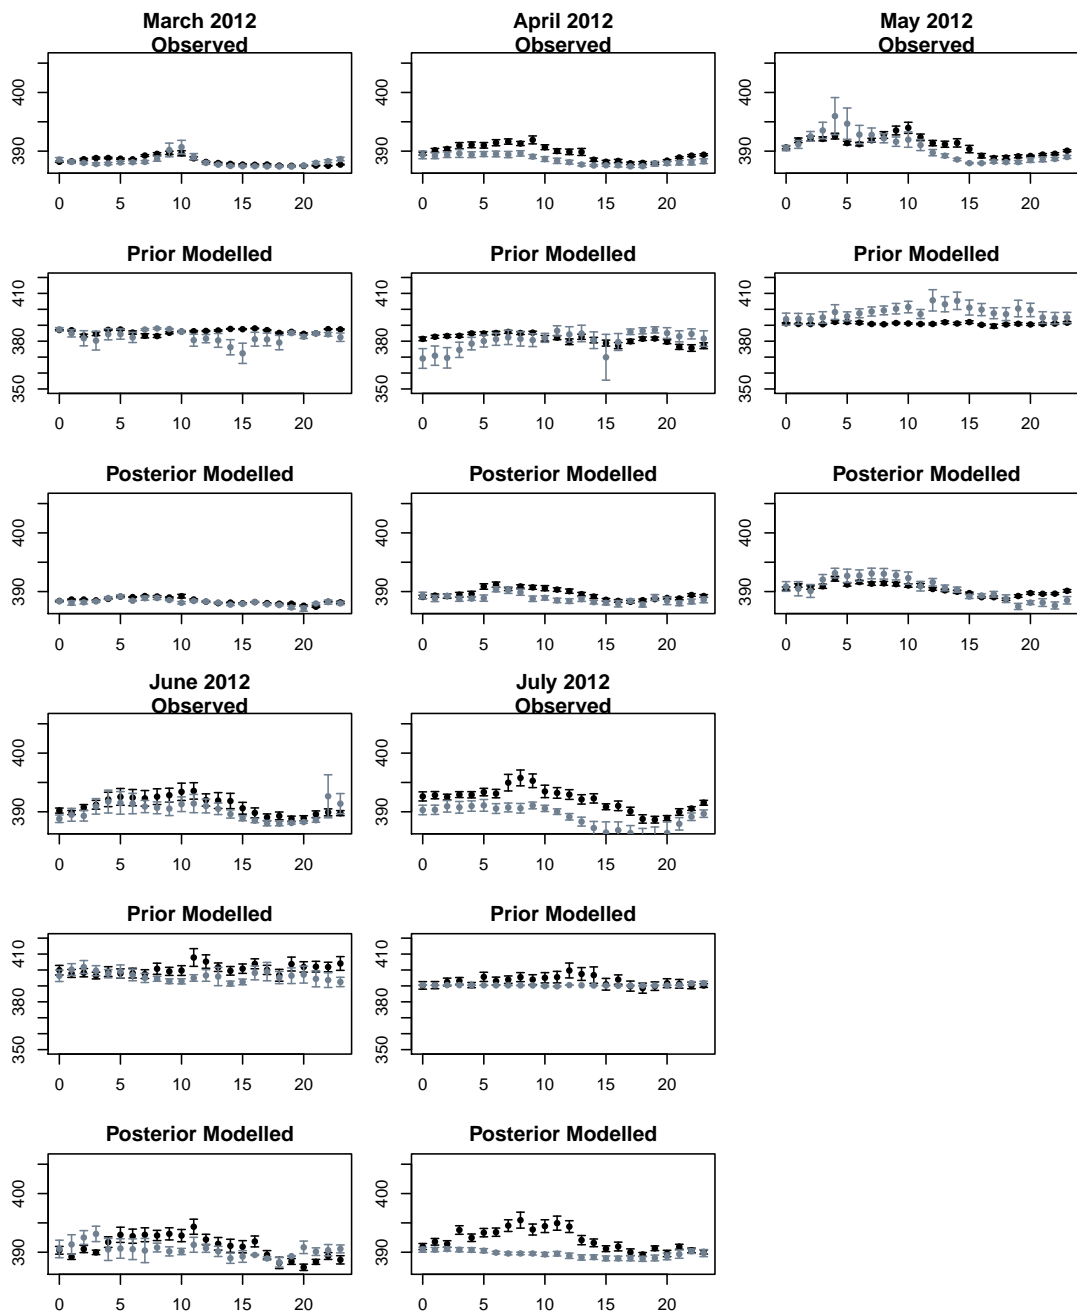

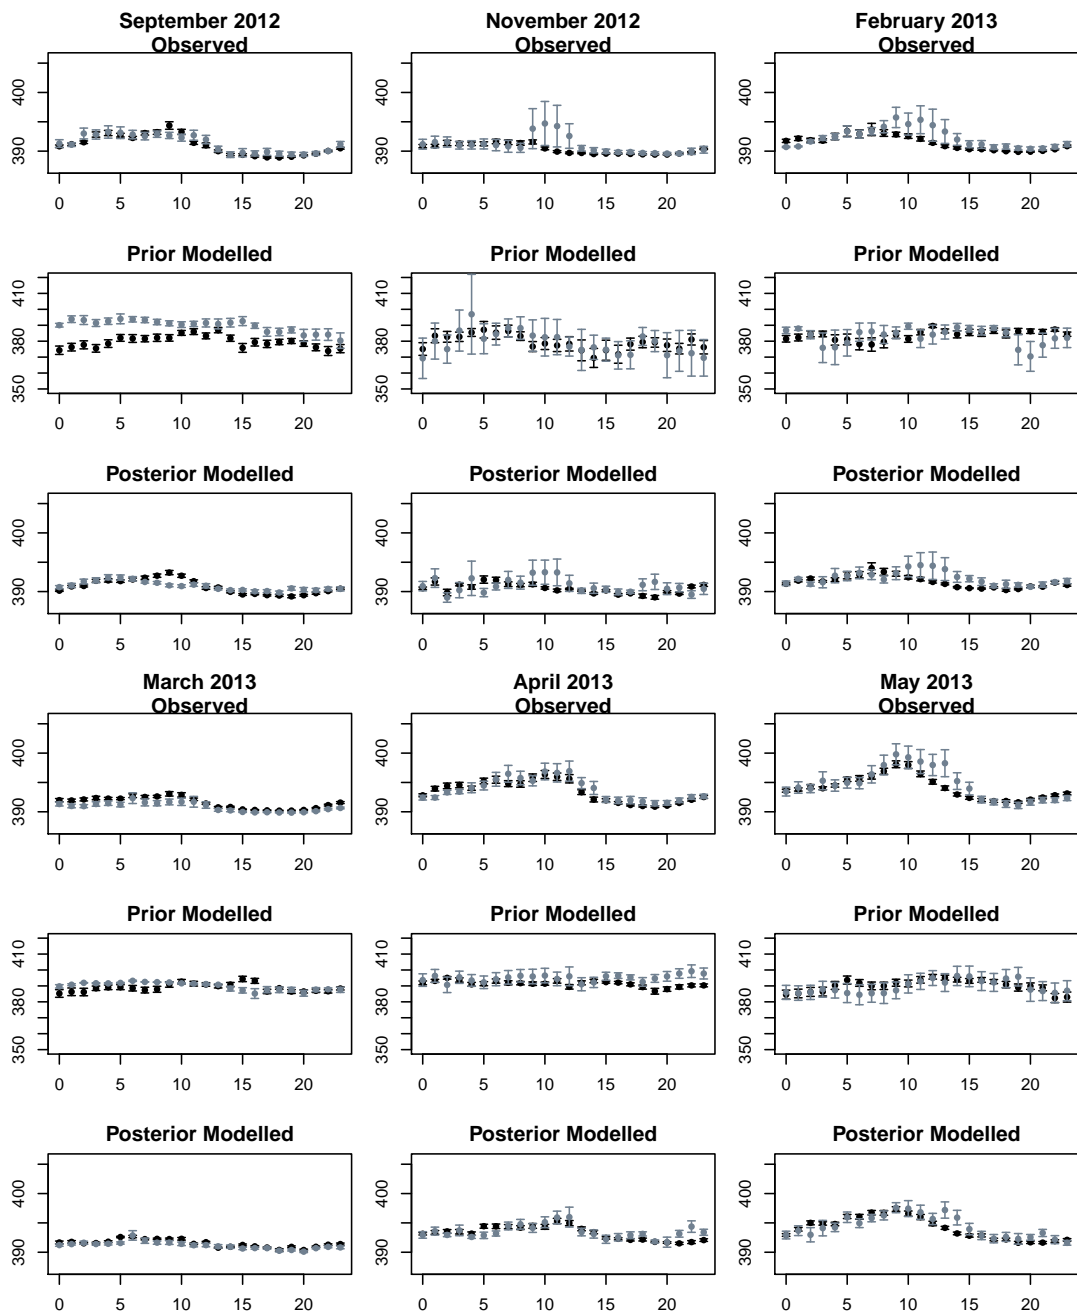

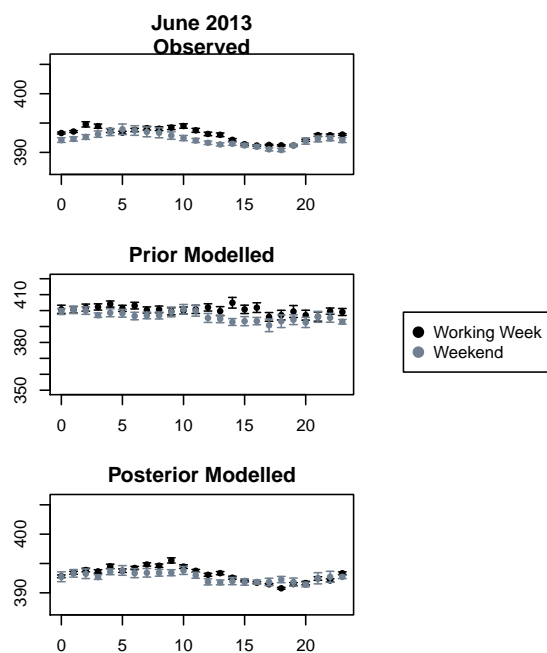

**Figure S8.** Diurnal cycle of the observed, prior modelled and posterior modelled CO<sub>2</sub> concentrations (ppm) at Hangklip, separated into working week (black) and weekend concentrations (grey), for each month with 95% confidence intervals, where the standard error is calculated over all measurements available for that hour of the day during that particular month.

## 1.6 Fossil Fuel and NEE Contributions

The contributions of the fossil fuel and NEE fluxes to the modelled concentrations are provided for Robben Island and Hangklip for the months July 2012 to June 2013. As for March 2012 to June 2012, the posterior estimates of the NEE fluxes are increased in such a way that the uptake of CO<sub>2</sub> cancels out the emission of CO<sub>2</sub> due to fossil fuel sources. Little adjustment is made to the contribution from the fossil fuel fluxes to the modelled concentration by the inversion.

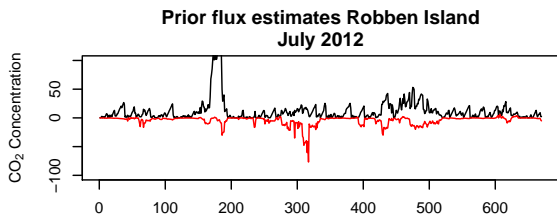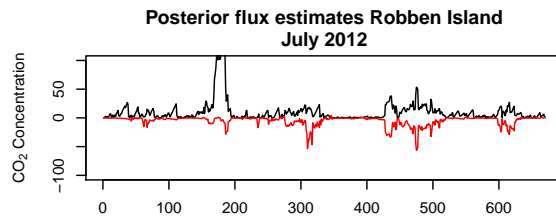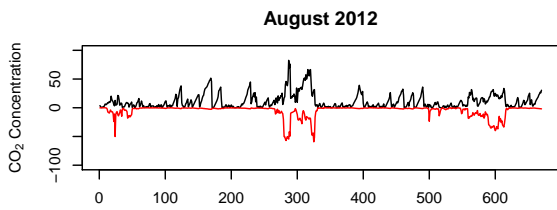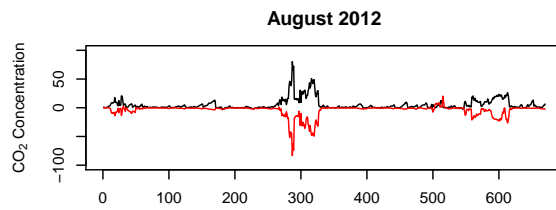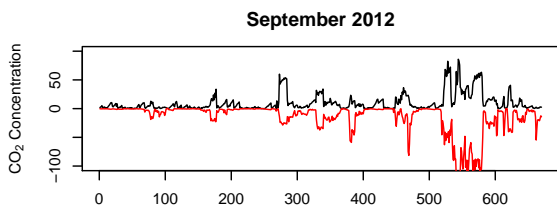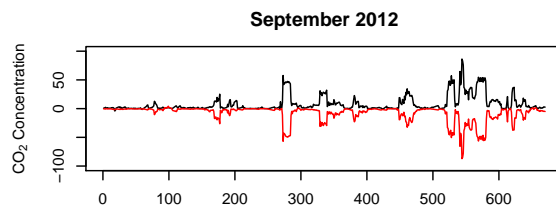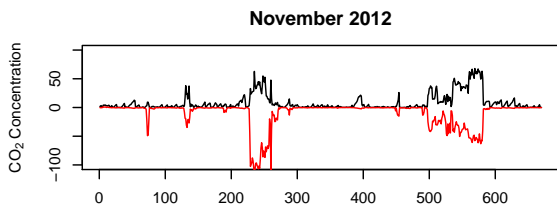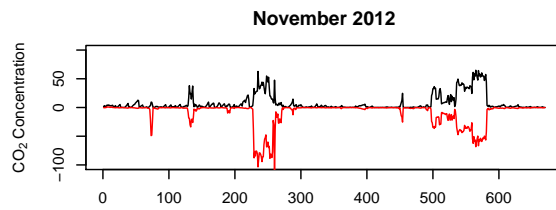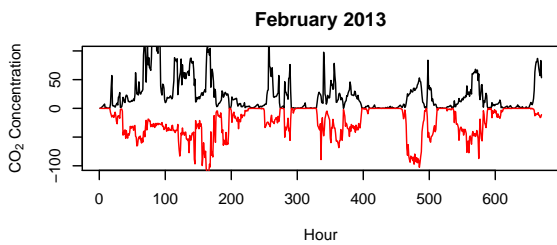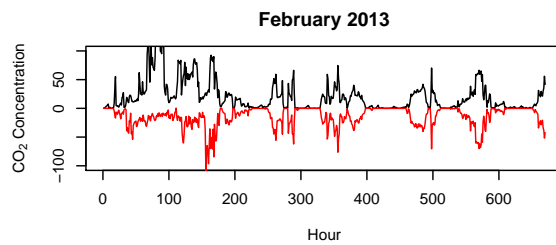

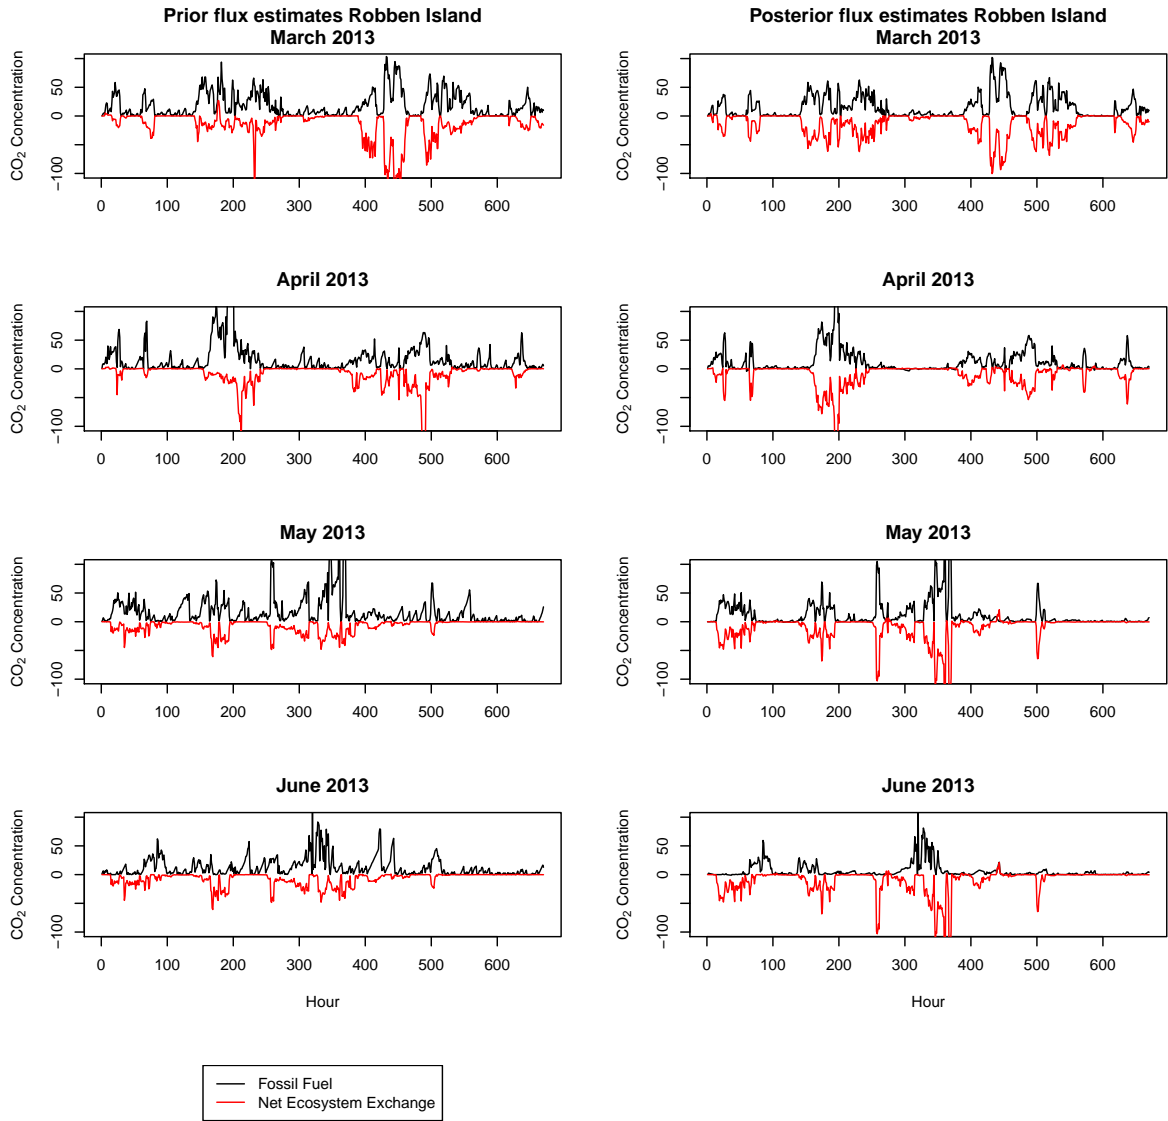

**Figure S9.** Contribution of the fossil fuel and NEE surface fluxes to the modelled CO<sub>2</sub> concentrations (ppm) at Robben Island.

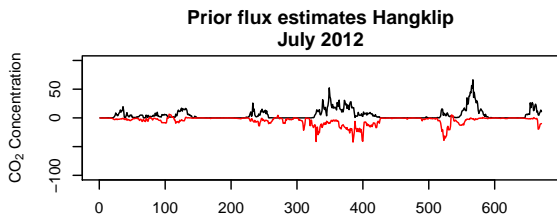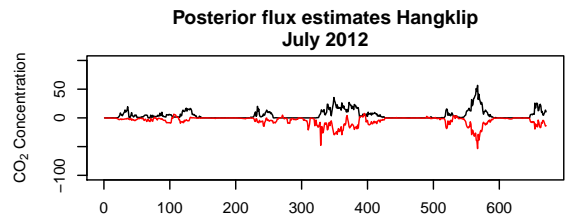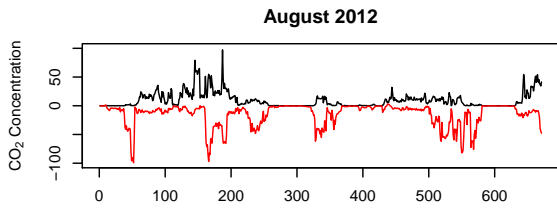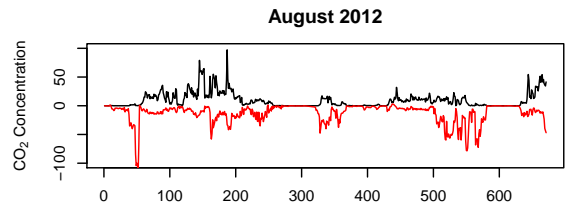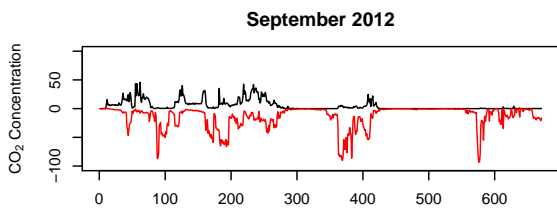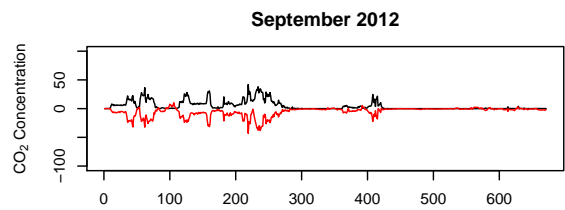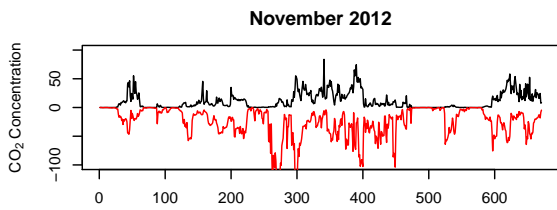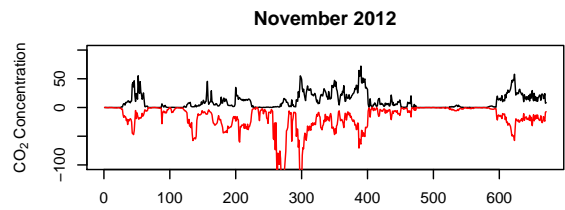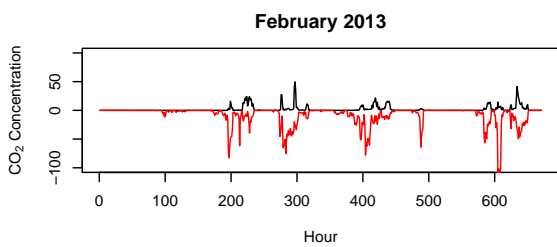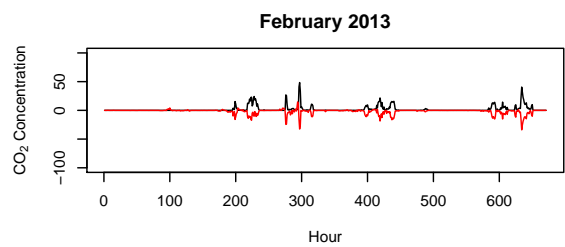

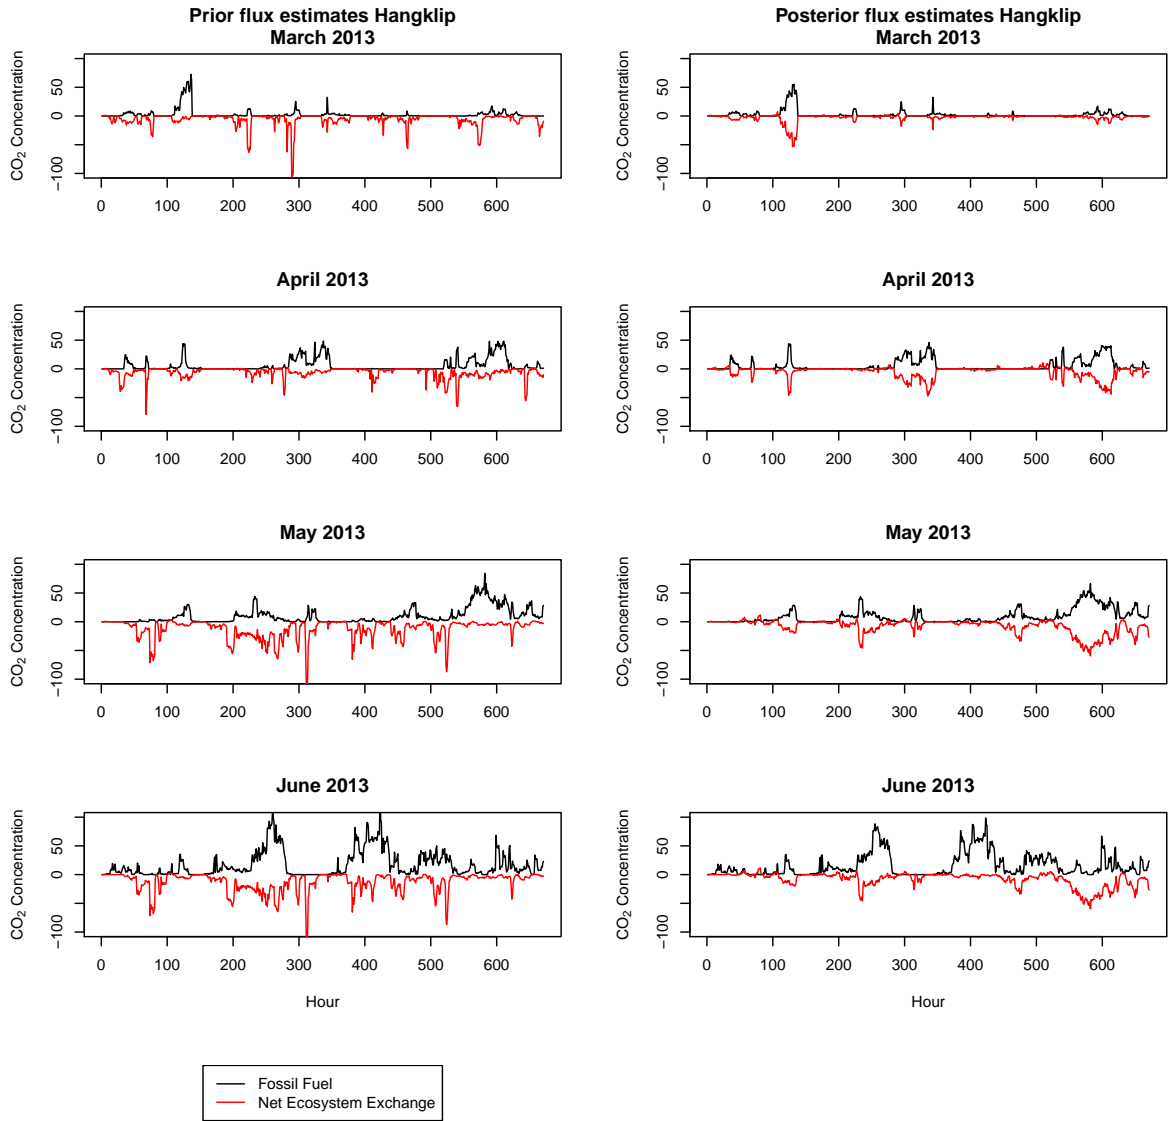

**Figure S10.** Contribution of the fossil fuel and NEE surface fluxes to the modelled CO<sub>2</sub> concentrations (ppm) at Hangklip.



## 1.7 Weekly Flux Estimates

Section 3.2 provides a summary of the estimates presented here for the pixel-level weekly fluxes over the full domain for each month.

March 2012

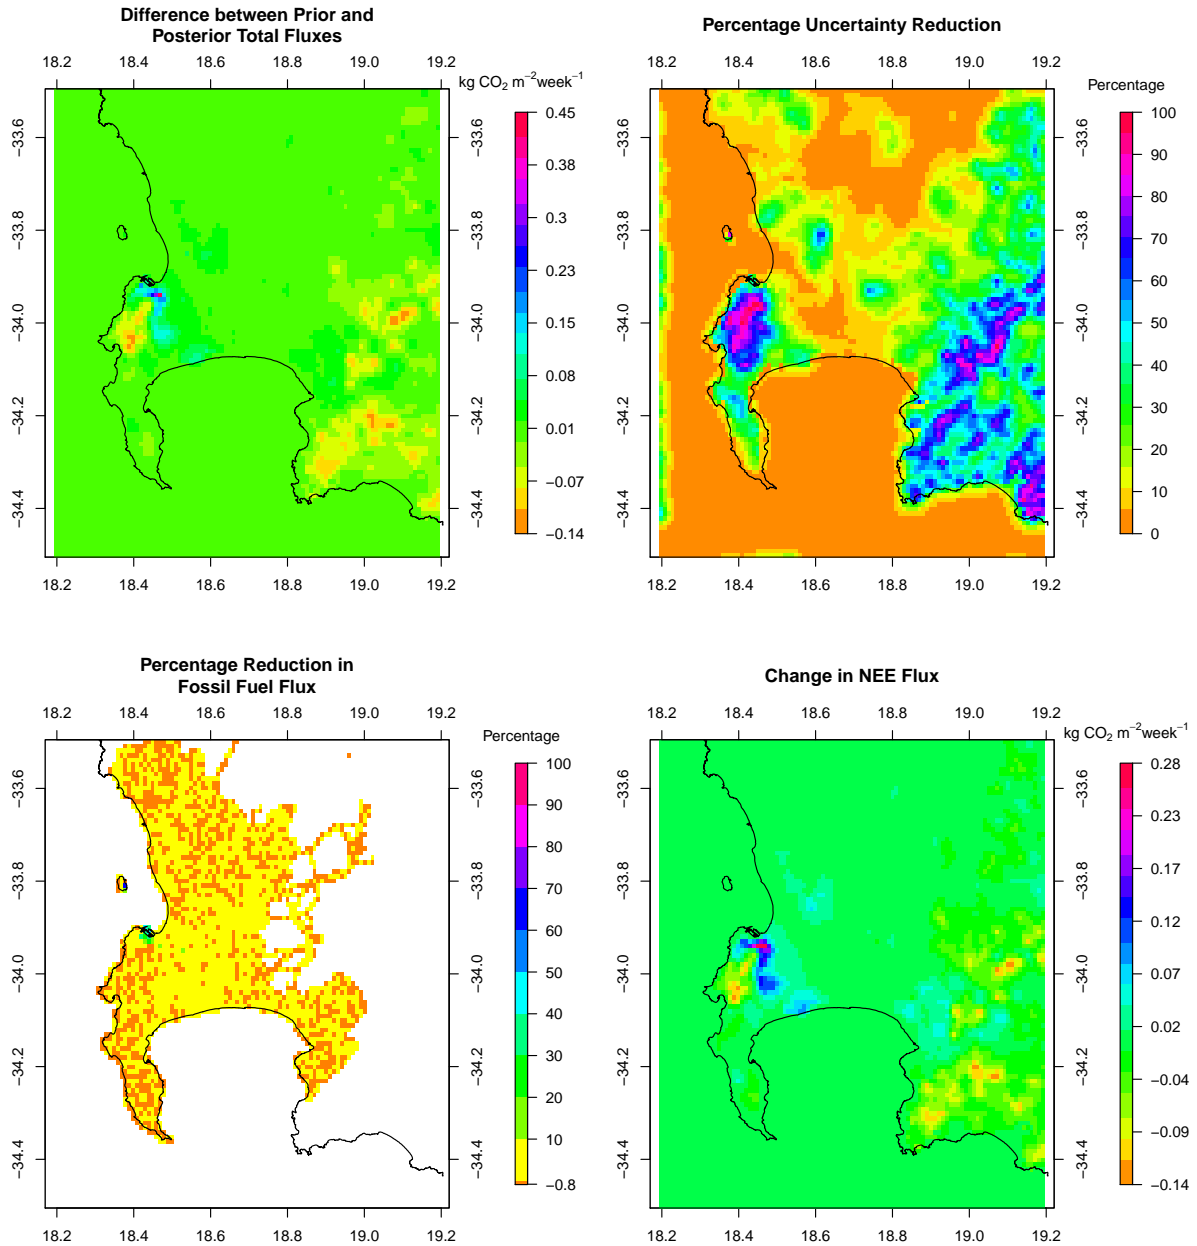

**Figure S11.** (Top left) Differences between the prior and posterior total flux estimates ( $\text{kg CO}_2\text{m}^{-2}\text{week}^{-1}$ ) for March 2012 (prior - posterior). (Top right) Percentage reduction in the standard deviation of the flux estimate from prior to posterior. (Bottom left) Percentage reduction in the fossil fuel flux estimates from prior to posterior. (Bottom right) Differences in the biogenic flux estimates between prior and posterior estimates (prior - posterior) ( $\text{kg CO}_2\text{m}^{-2}\text{week}^{-1}$ ), with negative values indicating posterior CO<sub>2</sub> fluxes were made more positive by the inversion compared with the prior estimates. Extent: between 34.5° and 33.5° S and between 18.2° and 19.2° E.

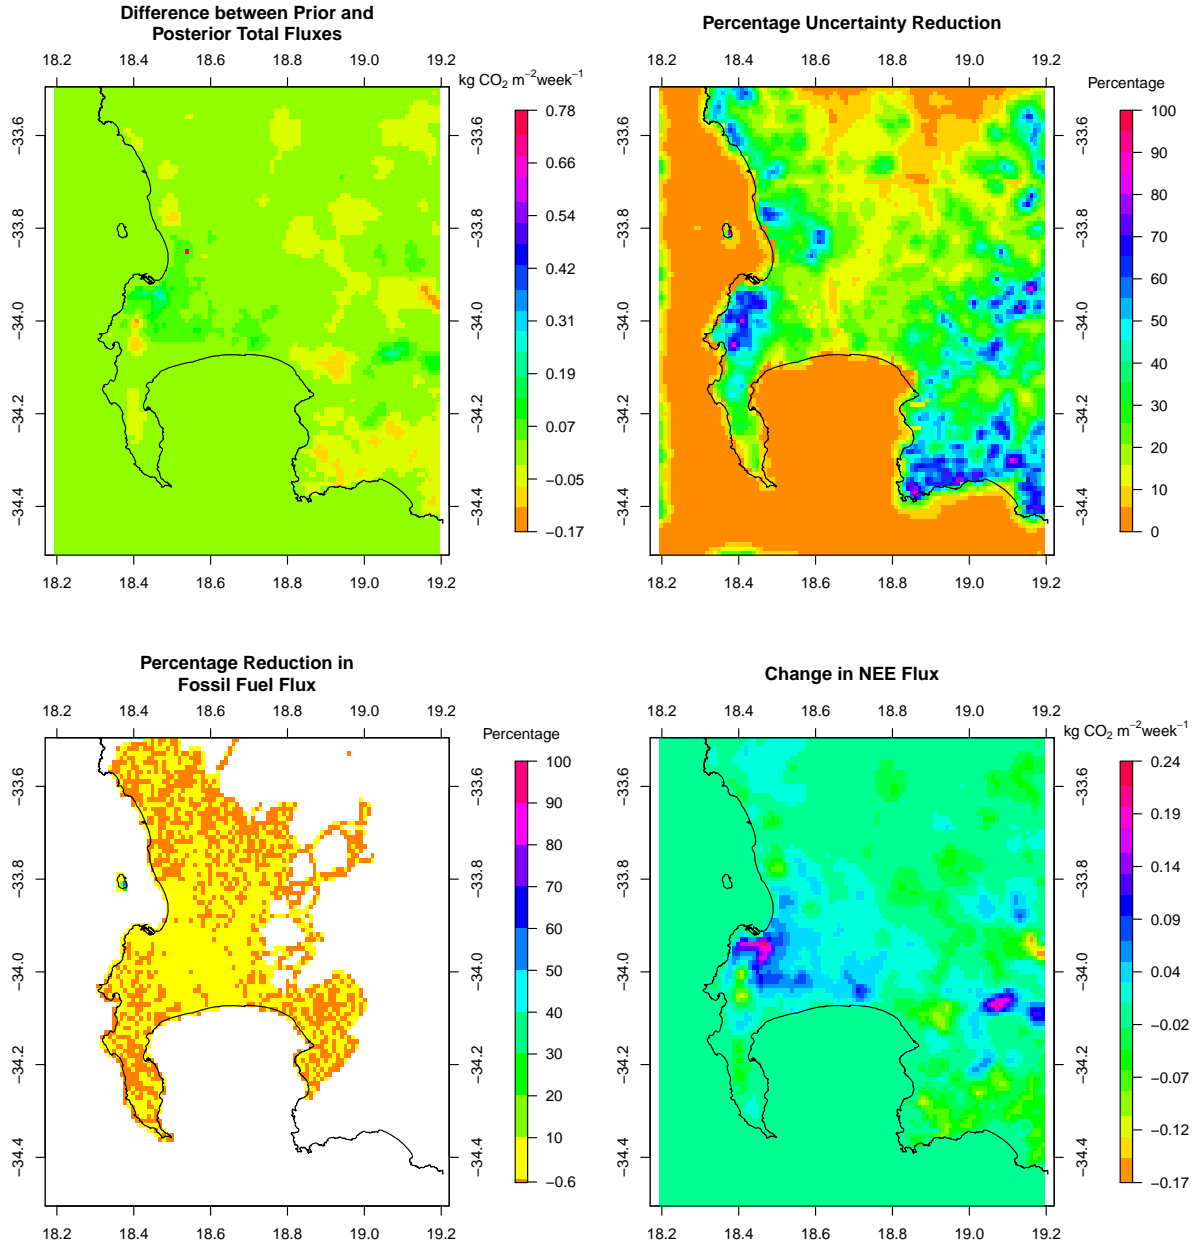

**Figure S12.** (Top left) Differences between the prior and posterior total flux estimates (kg CO<sub>2</sub>m<sup>-2</sup> week<sup>-1</sup>) for April 2012 (prior - posterior). (Top right) Percentage reduction in the standard deviation of the flux estimate from prior to posterior. (Bottom left) Percentage reduction in the fossil fuel flux estimates from prior to posterior. (Bottom right) Differences in the biogenic flux estimates between prior and posterior estimates (prior - posterior) (kg CO<sub>2</sub>m<sup>-2</sup> week<sup>-1</sup>), with negative values indicating posterior CO<sub>2</sub> fluxes were made more positive by the inversion compared with the prior estimates. Extent: between 34.5° and 33.5° S and between 18.2° and 19.2° E.

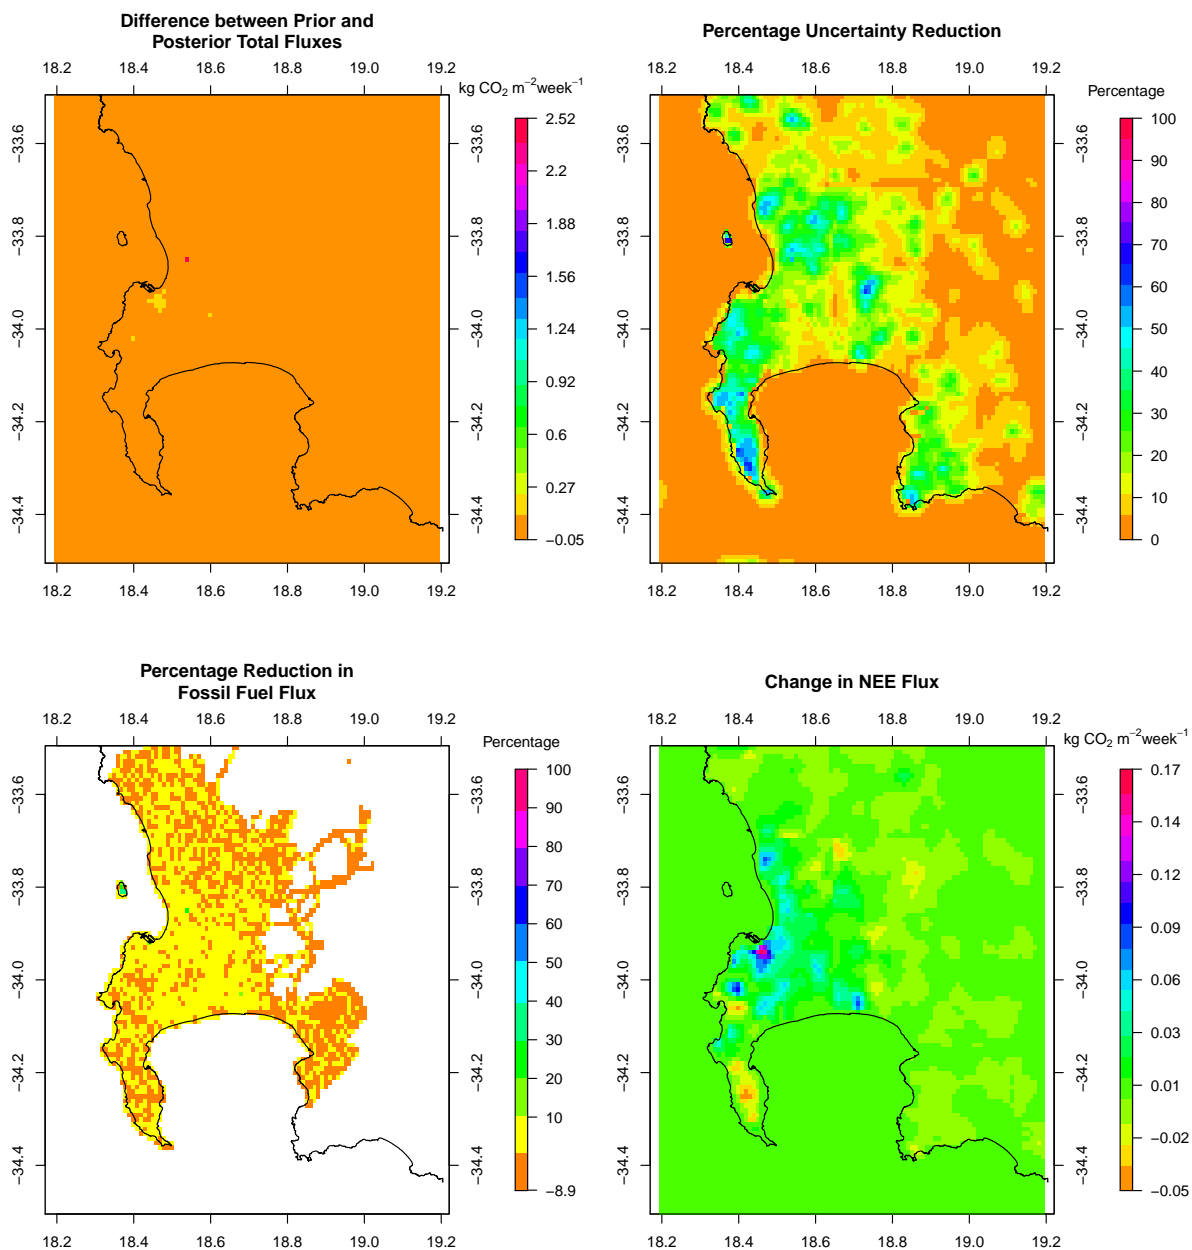

**Figure S13.** (Top left) Differences between the prior and posterior total flux estimates (kg CO<sub>2</sub>m<sup>-2</sup> week<sup>-1</sup>) for June 2012 (prior - posterior). (Top right) Percentage reduction in the standard deviation of the flux estimate from prior to posterior. (Bottom left) Percentage reduction in the fossil fuel flux estimates from prior to posterior. (Bottom right) Differences in the biogenic flux estimates between prior and posterior estimates (prior - posterior) (kg CO<sub>2</sub>m<sup>-2</sup> week<sup>-1</sup>), with negative values indicating posterior CO<sub>2</sub> fluxes were made more positive by the inversion compared with the prior estimates. Extent: between 34.5° and 33.5° S and between 18.2° and 19.2° E.

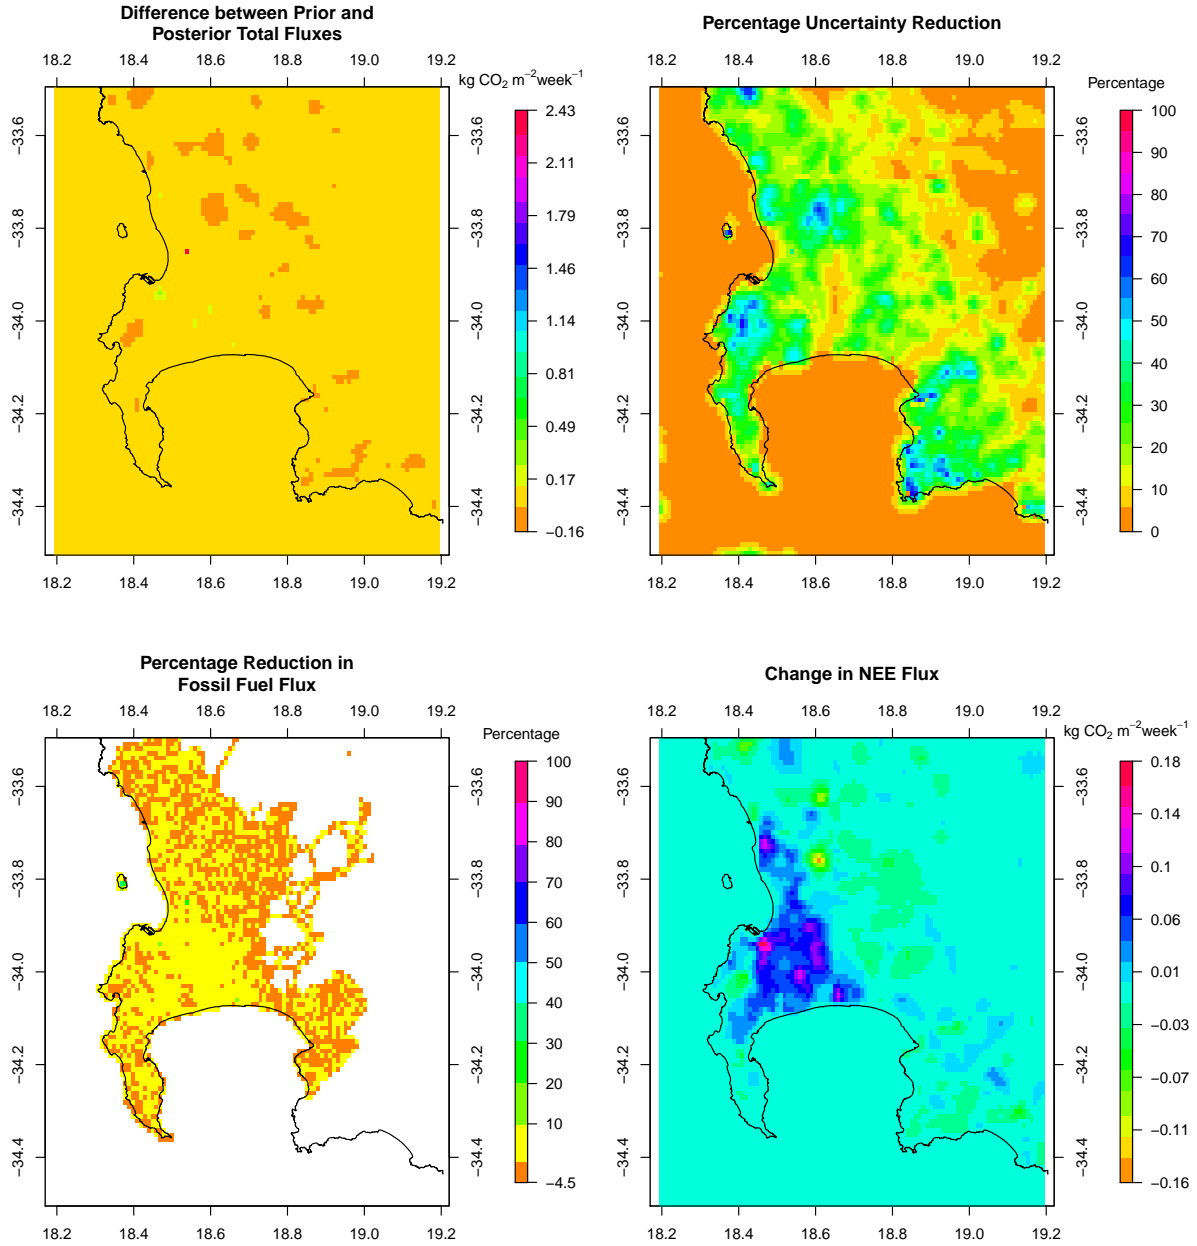

**Figure S14.** (Top left) Differences between the prior and posterior total flux estimates (kg CO<sub>2</sub>m<sup>-2</sup> week<sup>-1</sup>) for July 2012 (prior - posterior). (Top right) Percentage reduction in the standard deviation of the flux estimate from prior to posterior. (Bottom left) Percentage reduction in the fossil fuel flux estimates from prior to posterior. (Bottom right) Differences in the biogenic flux estimates between prior and posterior estimates (prior - posterior) (kg CO<sub>2</sub>m<sup>-2</sup> week<sup>-1</sup>), with negative values indicating posterior CO<sub>2</sub> fluxes were made more positive by the inversion compared with the prior estimates. Extent: between 34.5° and 33.5° S and between 18.2° and 19.2° E.

August 2012

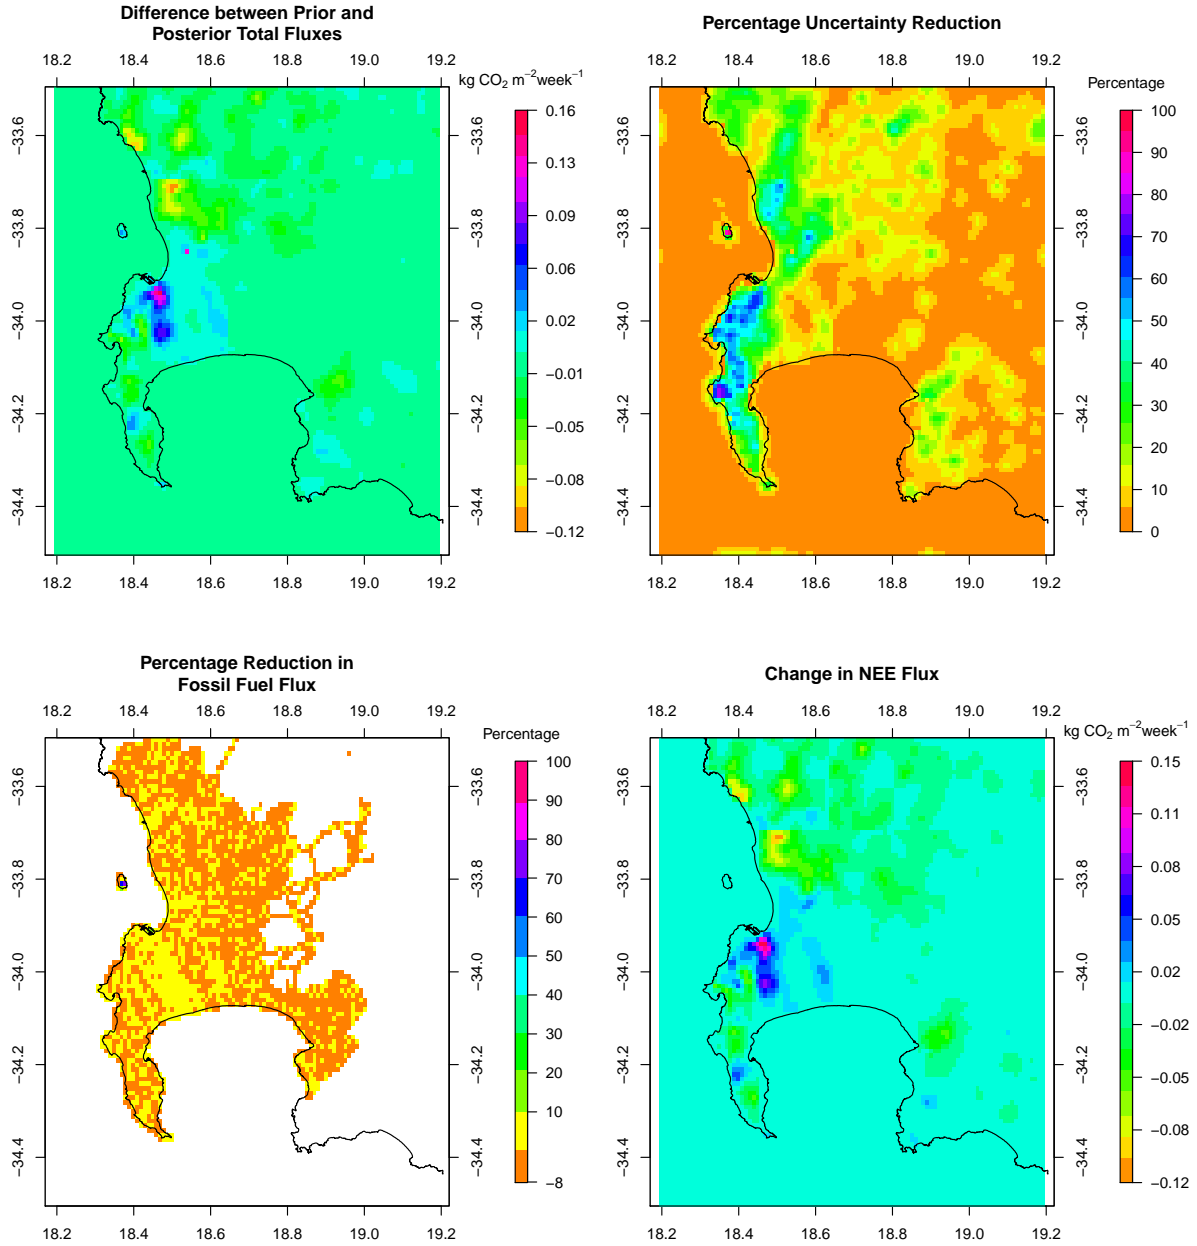

**Figure S15.** (Top left) Differences between the prior and posterior total flux estimates ( $\text{kg CO}_2\text{m}^{-2}\text{week}^{-1}$ ) for August 2012 (prior - posterior). (Top right) Percentage reduction in the standard deviation of the flux estimate from prior to posterior. (Bottom left) Percentage reduction in the fossil fuel flux estimates from prior to posterior. (Bottom right) Differences in the biogenic flux estimates between prior and posterior estimates (prior - posterior) ( $\text{kg CO}_2\text{m}^{-2}\text{week}^{-1}$ ), with negative values indicating posterior CO<sub>2</sub> fluxes were made more positive by the inversion compared with the prior estimates. Extent: between 34.5° and 33.5° S and between 18.2° and 19.2° E.

November 2012

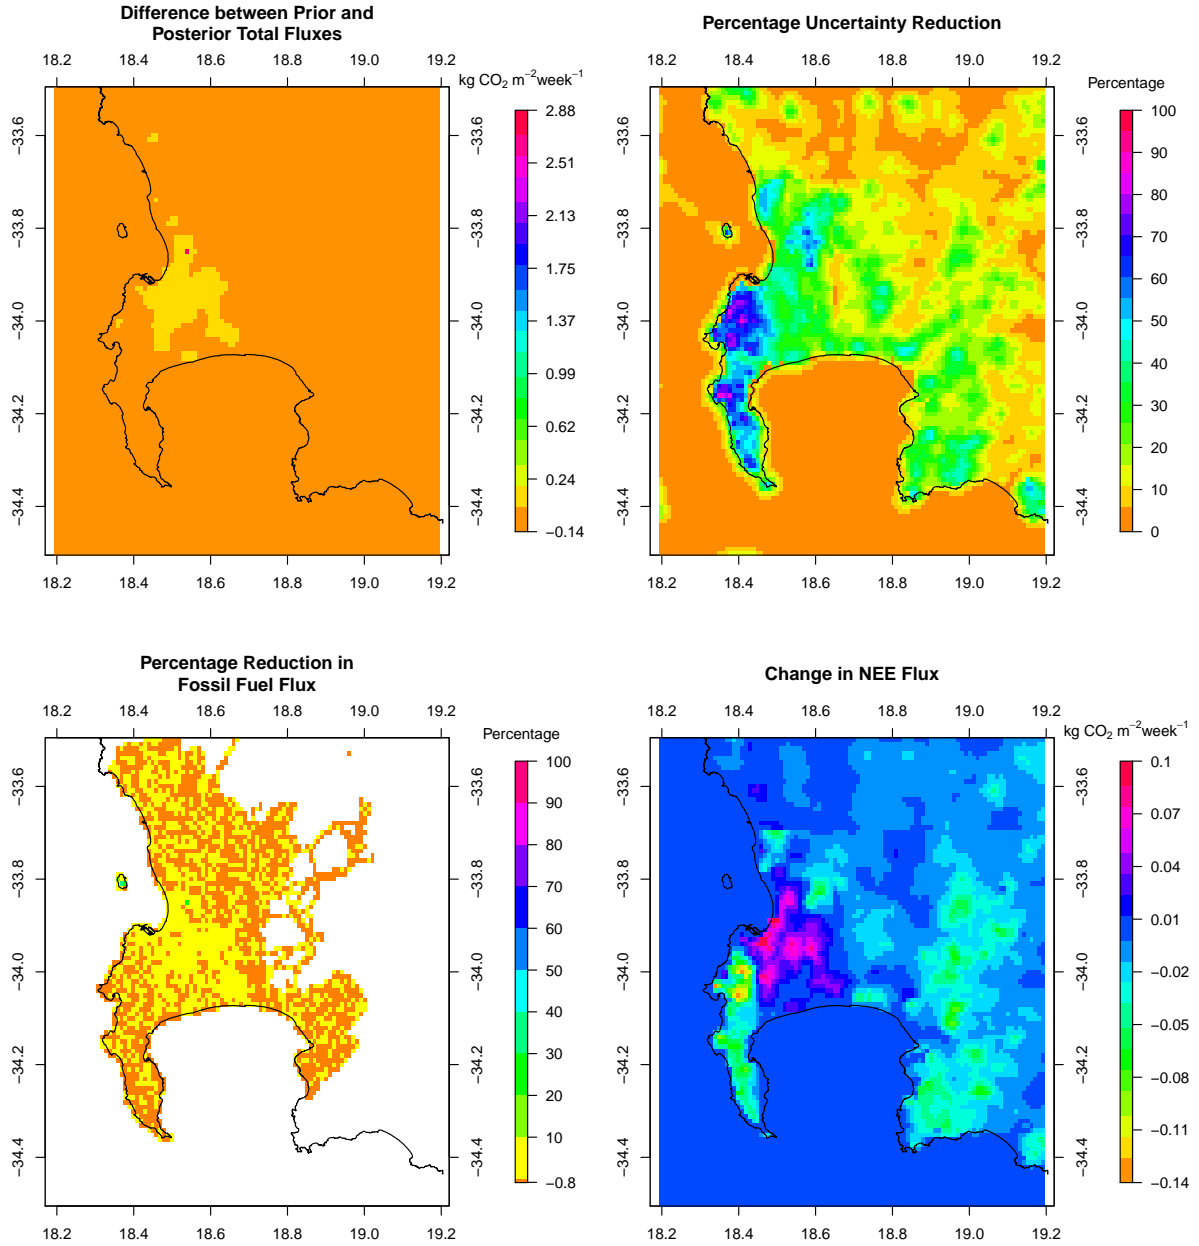

**Figure S16.** (Top left) Differences between the prior and posterior total flux estimates ( $\text{kg CO}_2\text{m}^{-2}\text{ week}^{-1}$ ) for November 2012 (prior - posterior). (Top right) Percentage reduction in the standard deviation of the flux estimate from prior to posterior. (Bottom left) Percentage reduction in the fossil fuel flux estimates from prior to posterior. (Bottom right) Differences in the biogenic flux estimates between prior and posterior estimates (prior - posterior) ( $\text{kg CO}_2\text{m}^{-2}\text{ week}^{-1}$ ), with negative values indicating posterior CO<sub>2</sub> fluxes were made more positive by the inversion compared with the prior estimates. Extent: between 34.5° and 33.5° S and between 18.2° and 19.2° E.

February 2013

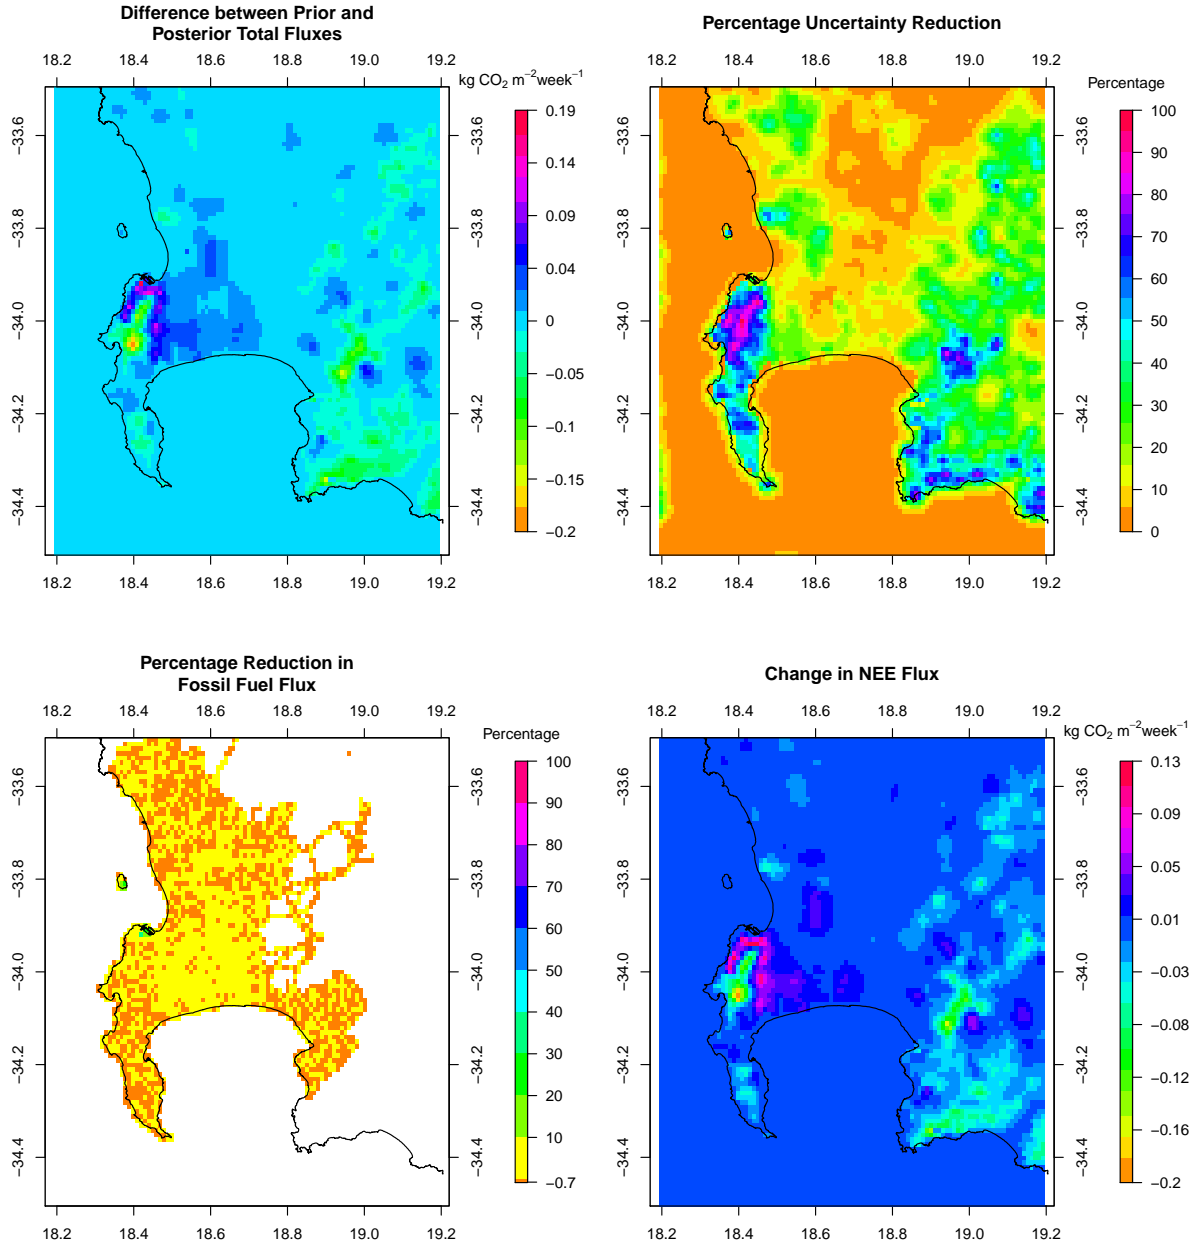

**Figure S17.** (Top left) Differences between the prior and posterior total flux estimates ( $\text{kg CO}_2\text{m}^{-2}\text{ week}^{-1}$ ) for February 2013 (prior - posterior). (Top right) Percentage reduction in the standard deviation of the flux estimate from prior to posterior. (Bottom left) Percentage reduction in the fossil fuel flux estimates from prior to posterior. (Bottom right) Differences in the biogenic flux estimates between prior and posterior estimates (prior - posterior) ( $\text{kg CO}_2\text{m}^{-2}\text{ week}^{-1}$ ), with negative values indicating posterior CO<sub>2</sub> fluxes were made more positive by the inversion compared with the prior estimates. Extent: between 34.5° and 33.5° S and between 18.2° and 19.2° E.



March 2013

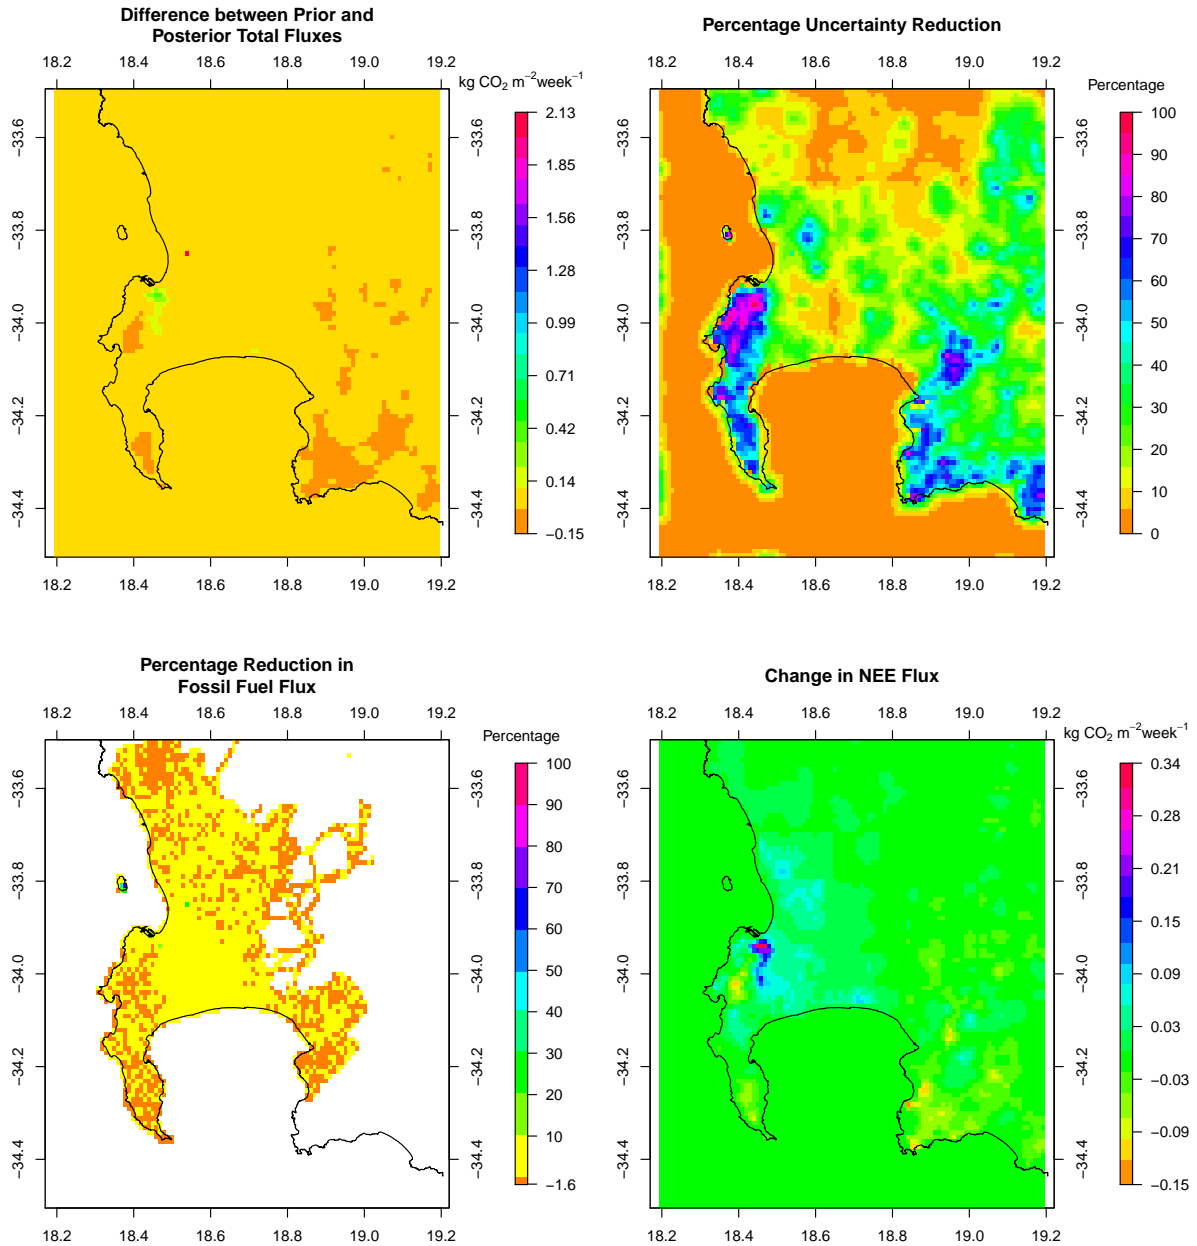

**Figure S18.** (Top left) Differences between the prior and posterior total flux estimates ( $\text{kg CO}_2\text{m}^{-2}\text{week}^{-1}$ ) for March 2013 (prior - posterior). (Top right) Percentage reduction in the standard deviation of the flux estimate from prior to posterior. (Bottom left) Percentage reduction in the fossil fuel flux estimates from prior to posterior. (Bottom right) Differences in the biogenic flux estimates between prior and posterior estimates (prior - posterior) ( $\text{kg CO}_2\text{m}^{-2}\text{week}^{-1}$ ), with negative values indicating posterior CO<sub>2</sub> fluxes were made more positive by the inversion compared with the prior estimates. Extent: between 34.5° and 33.5° S and between 18.2° and 19.2° E.

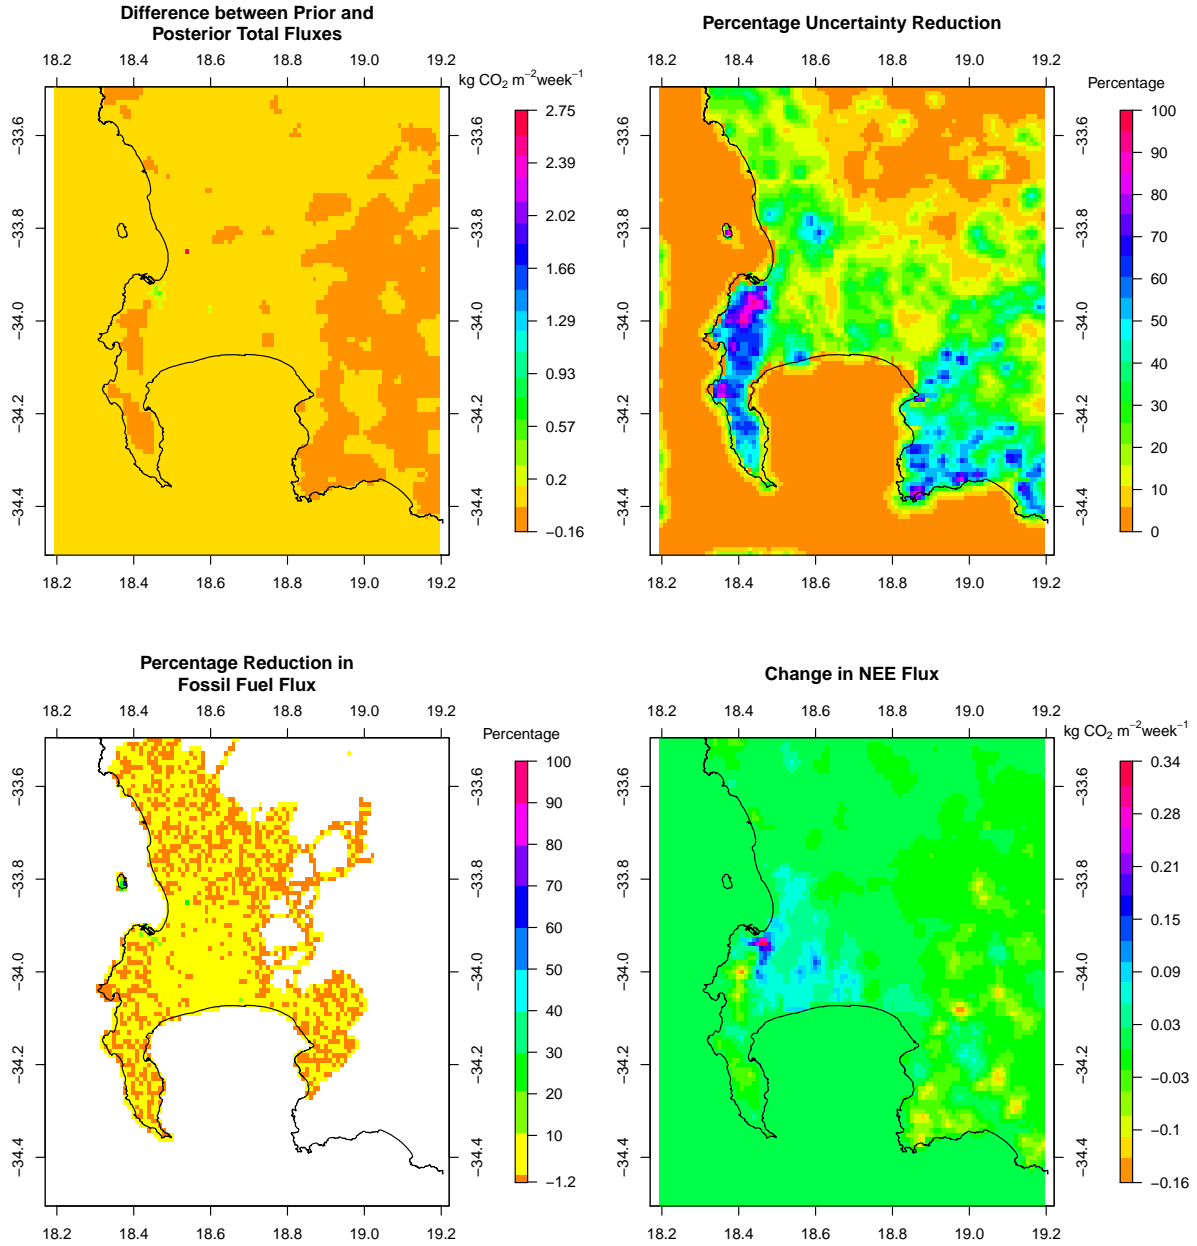

**Figure S19.** (Top left) Differences between the prior and posterior total flux estimates (kg CO<sub>2</sub>m<sup>-2</sup> week<sup>-1</sup>) for April 2013 (prior - posterior). (Top right) Percentage reduction in the standard deviation of the flux estimate from prior to posterior. (Bottom left) Percentage reduction in the fossil fuel flux estimates from prior to posterior. (Bottom right) Differences in the biogenic flux estimates between prior and posterior estimates (prior - posterior) (kg CO<sub>2</sub>m<sup>-2</sup> week<sup>-1</sup>), with negative values indicating posterior CO<sub>2</sub> fluxes were made more positive by the inversion compared with the prior estimates. Extent: between 34.5° and 33.5° S and between 18.2° and 19.2° E.

May 2013

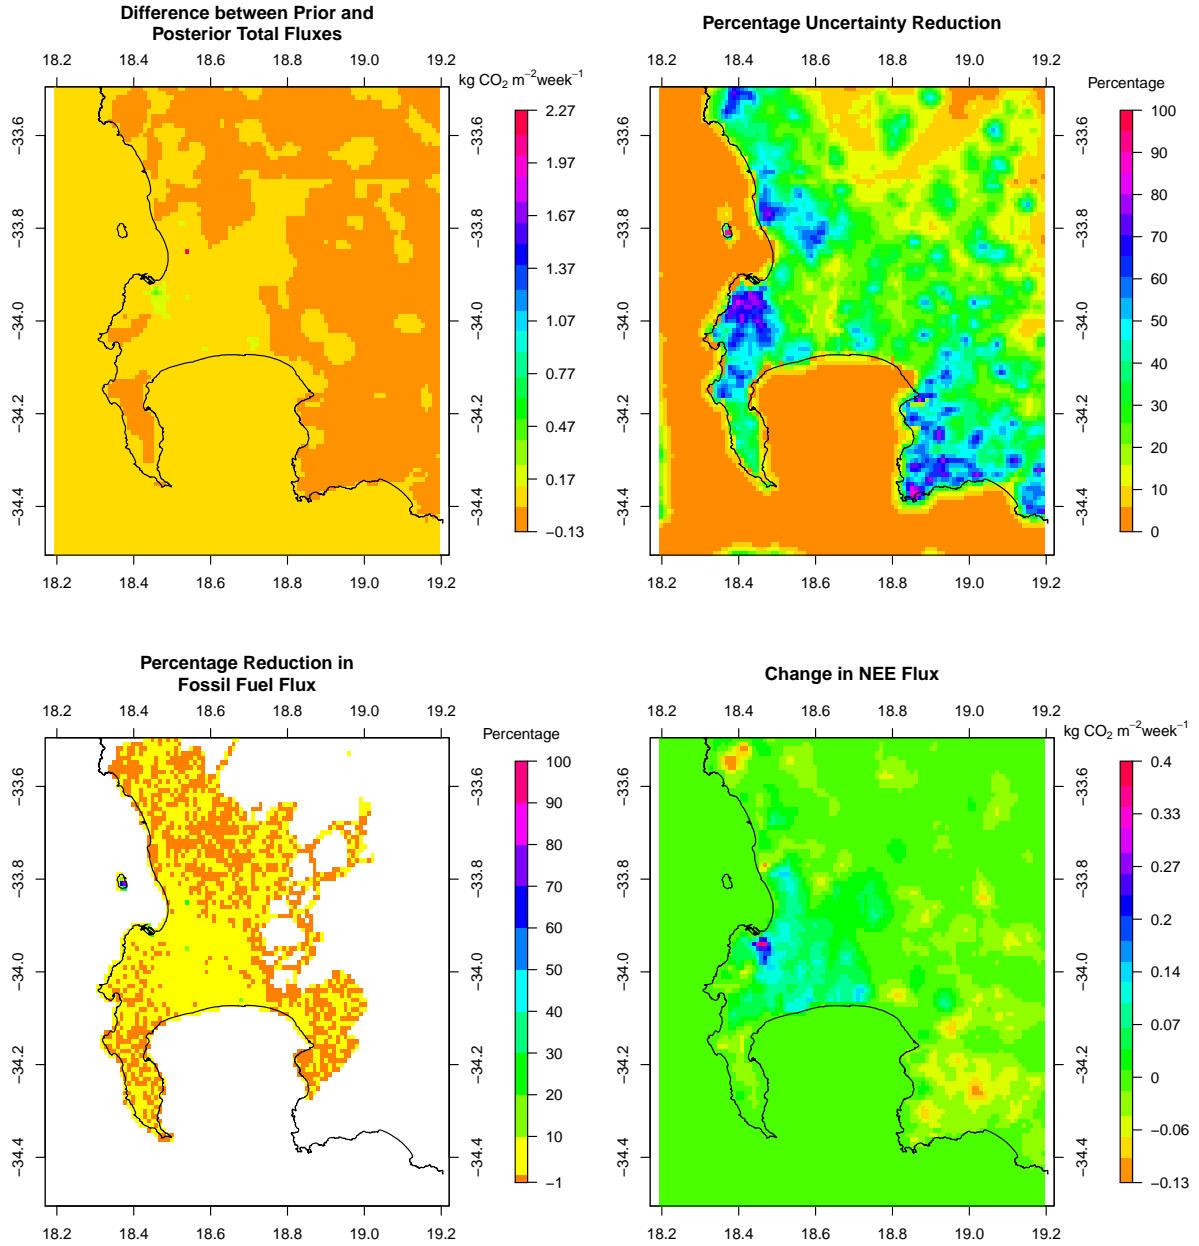

**Figure S20.** (Top left) Differences between the prior and posterior total flux estimates (kg CO<sub>2</sub>m<sup>-2</sup> week<sup>-1</sup>) for May 2013 (prior - posterior). (Top right) Percentage reduction in the standard deviation of the flux estimate from prior to posterior. (Bottom left) Percentage reduction in the fossil fuel flux estimates from prior to posterior. (Bottom right) Differences in the biogenic flux estimates between prior and posterior estimates (prior - posterior) (kg CO<sub>2</sub>m<sup>-2</sup> week<sup>-1</sup>), with negative values indicating posterior CO<sub>2</sub> fluxes were made more positive by the inversion compared with the prior estimates. Extent: between 34.5° and 33.5° S and between 18.2° and 19.2° E.

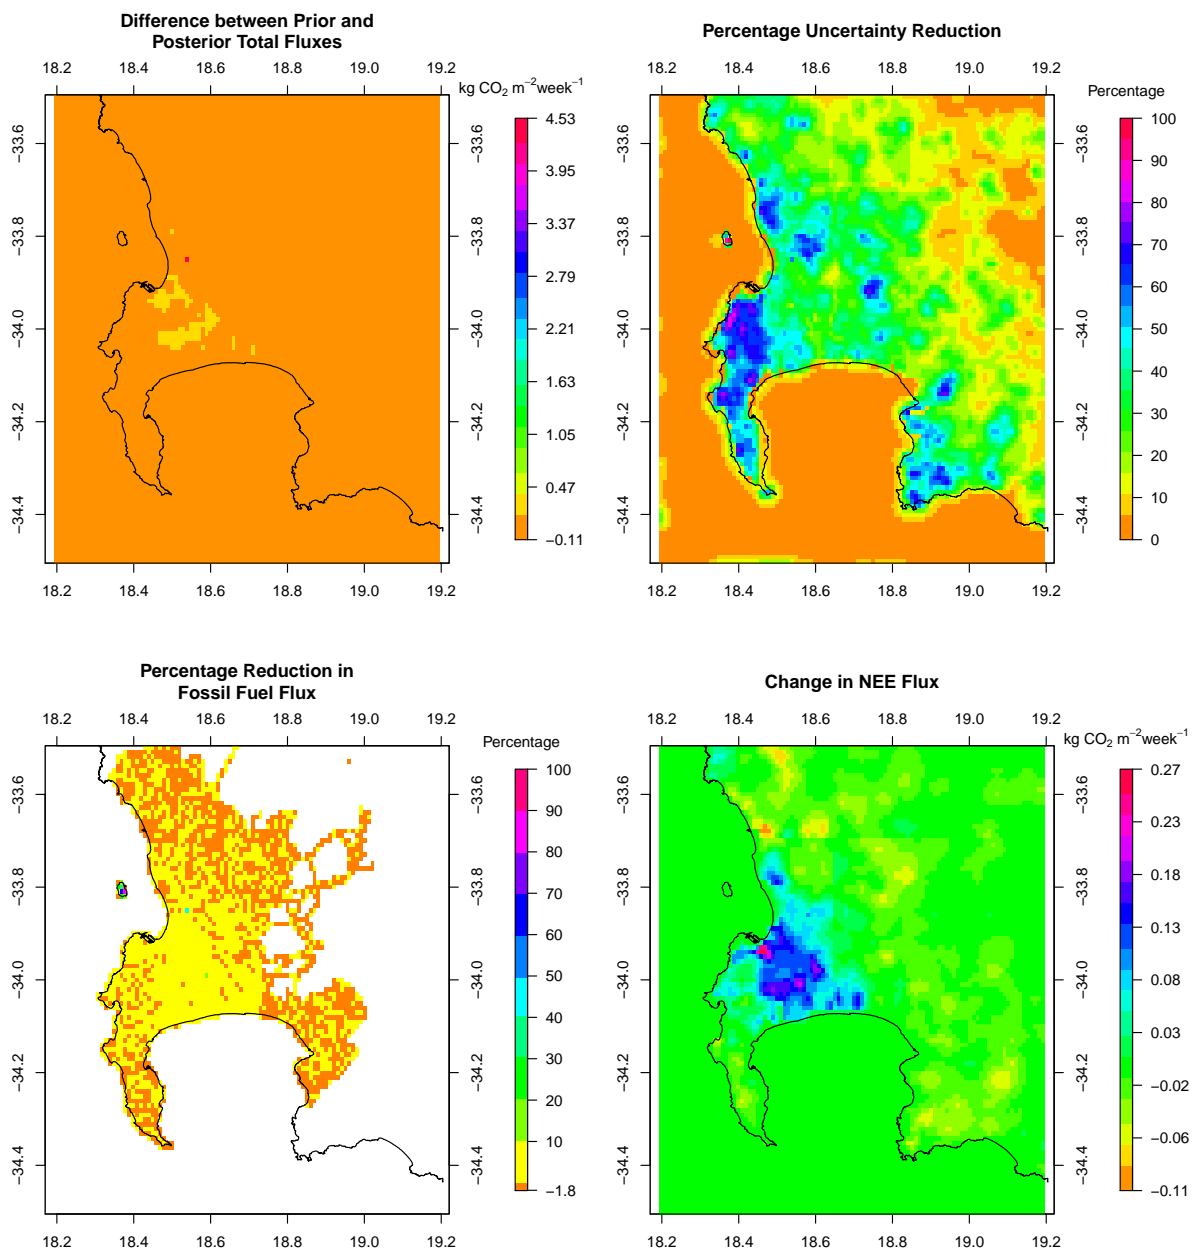

**Figure S21.** (Top left) Differences between the prior and posterior total flux estimates ( $\text{kg CO}_2 \text{m}^{-2} \text{week}^{-1}$ ) for June 2013 (prior - posterior). (Top right) Percentage reduction in the standard deviation of the flux estimate from prior to posterior. (Bottom left) Percentage reduction in the fossil fuel flux estimates from prior to posterior. (Bottom right) Differences in the biogenic flux estimates between prior and posterior estimates (prior - posterior) ( $\text{kg CO}_2 \text{m}^{-2} \text{week}^{-1}$ ), with negative values indicating posterior  $\text{CO}_2$  fluxes were made more positive by the inversion compared with the prior estimates. Extent: between 34.5° and 33.5° S and between 18.2° and 19.2° E.

## 1.8 Toy Inversion

Let us consider an hourly measurement at a single site, with a fossil fuel flux daytime source, a fossil fuel flux night-time source, an NEE flux from the same location, and an NEE flux from a neighbouring pixel. We wish to solve for these four fluxes and the covariance matrix of the uncertainties in these fluxes. Selecting some of the most extreme values for the uncertainties and for the sensitivities for the current inversion framework we could get the following:

$$\mathbf{H} = (0.0, 0.0126, 0.00902, 0.0032); \quad \mathbf{C}_{s_0} = \begin{pmatrix} 233 & 0 & 0 & 0 \\ 0 & 78 & 0 & 0 \\ 0 & 0 & 1578 & 1220 \\ 0 & 0 & 1220 & 1578 \end{pmatrix}; \quad \mathbf{C}_c = 4$$

Solving for the posterior covariance matrix of the flux uncertainties using:

$$\mathbf{C}_s = (\mathbf{H}^T \mathbf{C}_c^{-1} \mathbf{H} + \mathbf{C}_{s_0}^{-1})^{-1} \quad (1)$$

$$= \mathbf{C}_{s_0} - \mathbf{C}_{s_0} \mathbf{H}^T (\mathbf{H} \mathbf{C}_{s_0} \mathbf{H}^T + \mathbf{C}_c)^{-1} \mathbf{H} \mathbf{C}_{s_0}. \quad (2)$$

gives

$$\mathbf{C}_s = \begin{pmatrix} 233 & 0 & 0 & 0 \\ 0 & 77.8 & -4.2 & -3.7 \\ 0 & -4.2 & 1500.2 & 1151.1 \\ 0 & -3.7 & 1151.1 & 1517.0 \end{pmatrix}; \quad \rho_{\text{matrix}} = \begin{pmatrix} 1 & 0 & 0 & 0 \\ 0 & 1 & -0.01 & -0.01 \\ 0 & -0.01 & 1 & 0.76 \\ 0 & -0.01 & 0.76 & 1 \end{pmatrix};$$

Although the sensitivity of the concentration measurement to the fossil fuel and NEE fluxes are not that different, the posterior covariances are small because the transport Jacobian only projects fluxes from individual pixels weakly into modelled concentrations. The uncertainties in the prior modelled concentrations that are attributed to the flux contributions ( $\mathbf{H} \mathbf{C}_{s_0} \mathbf{H}^T$ ) are small relative to the uncertainties specified for the modelled concentration errors ( $\mathbf{C}_c$ ). If we reduce the elements of  $\mathbf{C}_c$  then the posterior covariances increase. For example, If  $\mathbf{C}_c = 1$  then

$$\mathbf{C}_s = \begin{pmatrix} 233 & 0 & 0 & 0 \\ 0 & 77.2 & -14.5 & -12.9 \\ 0 & -14.5 & 1310.0 & 982.8 \\ 0 & -12.9 & 982.8 & 1368.0 \end{pmatrix}; \quad \rho_{\text{matrix}} = \begin{pmatrix} 1 & 0 & 0 & 0 \\ 0 & 1 & -0.04 & -0.04 \\ 0 & -0.04 & 1 & 0.73 \\ 0 & -0.04 & 0.73 & 1 \end{pmatrix};$$

## References

Lamigueiro, O., P.: Visualization methods for raster data, ver. 0.41. <http://oscarperpinan.github.io/rastervis>
